# Supplementary material for: An observational and genetic investigation into the association between psoriasis and risk of malignancy
Source: PubMed Central journal article supplement — Nat Commun. 2024 Sep 11;15:7952. doi: 10.1038/s41467-024-51824-6 (PMC11391051; doi:10.1038/s41467-024-51824-6), 2024-09-11
Supplement: 41467_2024_51824_MOESM1_ESM.pdf [file 41467_2024_51824_MOESM1_ESM.pdf]

**Supplementary Materials for An observational and genetic investigation into the association between psoriasis and risk of malignancy**

Authors: Ruolin Li, MD\*, Wenjin Luo, MD\*, Xiangjun Chen, MD, Qinglian Zeng, MD, Shumin Yang, MD, PhD, Ping Wang, MD, PhD, Jinbo Hu, MD, PhD, # Aijun Chen, MD, PhD#

#Corresponding author: Jinbo Hu (hujinbo@cqmu.edu.cn) and Aijun Chen (chenaijun@hospital.cqmu.edu.cn), The First Affiliated Hospital of Chongqing Medical University, No.1 Youyi Street, Yuzhong District, Chongqing, China, 400016. Phone: +86-023-89011552, Fax: +86-023-89011552.

\*These authors contributed equally to this work.

This file includes: Supplementary Table 1-29, Supplementary Figure 1-5.

**Supplementary Table 1. Multi-variable Cox regression analysis for risk of cancers associated with psoriasis (Whole population).**

All statistical tests are two-sided and unadjusted for multiple comparisons.

| Cancers                                                                                   | Case/Total   | HR (95%CI)      | p value |
|-------------------------------------------------------------------------------------------|--------------|-----------------|---------|
| Lip, oral cavity and pharynx                                                              |              |                 |         |
| C00 Malignant neoplasm of lip                                                             | 62/476574    | 1.68(0.52,5.37) | 0.383   |
| C02 Malignant neoplasm of other and unspecified parts of tongue                           | 269/476495   | 1.20(0.64,2.26) | 0.573   |
| C03 Malignant neoplasm of gum                                                             | 65/476589    | 0.48(0.07,3.50) | 0.471   |
| C04 Malignant neoplasm of floor of mouth                                                  | 53/476567    | 2.39(0.89,6.42) | 0.083   |
| C06 Malignant neoplasm of other and unspecified parts of mouth                            | 95/476570    | 1.37(0.50,3.76) | 0.539   |
| C07 Malignant neoplasm of parotid gland                                                   | 117/476550   | 1.51(0.62,3.72) | 0.365   |
| C09 Malignant neoplasm of tonsil                                                          | 283/476505   | 0.66(0.30,1.49) | 0.323   |
| C10 Malignant neoplasm of oropharynx                                                      | 102/476574   | 1.16(0.43,3.15) | 0.772   |
| C14 Malignant neoplasm of other and ill-defined sites in the lip, oral cavity and pharynx | 94/476578    | 0.91(0.29,2.86) | 0.866   |
| Digestive organs                                                                          |              |                 |         |
| C15 Malignant neoplasm of oesophagus                                                      | 1405/476411  | 1.05(0.80,1.40) | 0.716   |
| C16 Malignant neoplasm of stomach                                                         | 1079/476449  | 0.93(0.66,1.32) | 0.680   |
| C17 Malignant neoplasm of small intestine                                                 | 315/476542   | 0.85(0.42,1.72) | 0.654   |
| C18 Malignant neoplasm of colon                                                           | 4730/475361  | 0.97(0.82,1.15) | 0.762   |
| C19 Malignant neoplasm of rectosigmoid junction                                           | 1107/476293  | 0.79(0.54,1.16) | 0.235   |
| C20 Malignant neoplasm of rectum                                                          | 2040/475891  | 1.14(0.90,1.45) | 0.282   |
| C21 Malignant neoplasm of anus and anal canal                                             | 268/476518   | 1.64(0.93,2.89) | 0.089   |
| C22 Malignant neoplasm of liver and intrahepatic bile ducts                               | 903/476551   | 1.24(0.89,1.72) | 0.211   |
| C23 Malignant neoplasm of gallbladder                                                     | 147/476595   | 1.10(0.45,2.69) | 0.842   |
| C24 Malignant neoplasm of other and unspecified parts of biliary tract                    | 289/476566   | 0.91(0.45,1.85) | 0.798   |
| C25 Malignant neoplasm of pancreas                                                        | 1581/476529  | 0.94(0.70,1.25) | 0.660   |
| C26 Malignant neoplasm of other and ill-defined digestive organs                          | 285/476551   | 1.43(0.81,2.52) | 0.214   |
| Respiratory system and intrathoracic organs                                               |              |                 |         |
| C32 Malignant neoplasm of larynx                                                          | 253/476460   | 1.39(0.78,2.45) | 0.260   |
| C34 Malignant neoplasm of bronchus and lung                                               | 4828/476296  | 1.15(0.99,1.32) | 0.065   |
| C38 Malignant neoplasm of heart, mediastinum and pleura                                   | 93/476591    | 1.06(0.33,3.34) | 0.926   |
| Bone and articular cartilage                                                              |              |                 |         |
| C41 Malignant neoplasm of bone and articular cartilage of other and unspecified sites     | 141/476565   | 1.01(0.41,2.46) | 0.989   |
| Skin                                                                                      |              |                 |         |
| C43 Malignant melanoma of skin                                                            | 2862/475595  | 1.14(0.92,1.42) | 0.223   |
| C44 Other malignant neoplasms of skin                                                     | 17470/471914 | 1.11(1.02,1.21) | 0.015   |
| Mesothelial and soft tissue                                                               |              |                 |         |
| C45 Mesothelioma                                                                          | 474/476590   | 1.54(1.00,2.37) | 0.048   |
| C48 Malignant neoplasm of retroperitoneum and peritoneum                                  | 357/476559   | 1.04(0.55,1.94) | 0.911   |
| C49 Malignant neoplasm of other connective and soft tissue                                | 399/476442   | 0.72(0.37,1.42) | 0.345   |
| Breast                                                                                    |              |                 |         |
| C50 Malignant neoplasm of breast                                                          | 10173/470084 | 1.23(1.11,1.38) | < 0.001 |
| Urinary tract                                                                             |              |                 |         |
| C64 Malignant neoplasm of kidney, except renal pelvis                                     | 1650/476220  | 1.17(0.91,1.51) | 0.222   |
| C66 Malignant neoplasm of ureter                                                          | 184/476572   | 0.66(0.24,1.77) | 0.407   |
| C67 Malignant neoplasm of bladder                                                         | 3012/475613  | 1.18(0.99,1.42) | 0.071   |
| C68 Malignant neoplasm of other and unspecified urinary organs                            | 78/476586    | 1.59(0.58,4.35) | 0.369   |
| Central nervous system                                                                    |              |                 |         |
| C69 Malignant neoplasm of eye and adnexa                                                  | 157/476478   | 0.63(0.20,1.97) | 0.426   |
| C71 Malignant neoplasm of brain                                                           | 967/476502   | 0.96(0.66,1.40) | 0.830   |
| Endocrine glands                                                                          |              |                 |         |
| C73 Malignant neoplasm of thyroid gland                                                   | 454/476378   | 0.64(0.32,1.29) | 0.211   |
| Ill-defined, secondary and unspecified sites                                              |              |                 |         |
| C76 Malignant neoplasm of other and ill-defined sites                                     | 168/476544   | 0.55(0.17,1.77) | 0.315   |
| C77 Secondary and unspecified malignant neoplasm of lymph nodes                           | 9634/474581  | 1.12(1.00,1.25) | 0.045   |
| C78 Secondary malignant neoplasm of respiratory and digestive organs                      | 11082/476023 | 0.95(0.85,1.06) | 0.361   |
| C79 Secondary malignant neoplasm of other sites                                           | 8958/476179  | 0.97(0.86,1.10) | 0.633   |
| C80 Malignant neoplasm without specification of site                                      | 2454/476329  | 0.95(0.75,1.20) | 0.664   |
| Lymphoid, haematopoietic and related tissue                                               |              |                 |         |
| C81 Hodgkin's disease                                                                     | 262/476436   | 1.50(0.84,2.69) | 0.167   |
| C82 Follicular [nodular] non-Hodgkin's lymphoma                                           | 577/476370   | 0.85(0.51,1.42) | 0.535   |
| C83 Diffuse non-Hodgkin's lymphoma                                                        | 1435/476329  | 1.17(0.88,1.55) | 0.283   |
| C85 Other and unspecified types of non-Hodgkin's lymphoma                                 | 1367/475959  | 1.04(0.76,1.41) | 0.814   |
| C86 Other specified types of T/NK-cell lymphoma                                           | 62/476599    | 1.70(0.53,5.45) | 0.369   |
| C88 Malignant immunoproliferative diseases                                                | 236/476572   | 0.74(0.31,1.80) | 0.509   |
| C90 Multiple myeloma and malignant plasma cell neoplasms                                  | 1123/476396  | 1.03(0.73,1.45) | 0.862   |
| C91 Lymphoid leukaemia                                                                    | 978/476324   | 0.91(0.62,1.34) | 0.639   |
| C92 Myeloid leukaemia                                                                     | 727/476393   | 1.34(0.92,1.94) | 0.124   |
| C94 Other leukaemias of specified cell type                                               | 60/476597    | 0.53(0.07,3.86) | 0.535   |
| Primary multiple sites                                                                    |              |                 |         |
| C97 Malignant neoplasms of primary multiple sites                                         | 1282/476594  | 1.43(1.08,1.88) | 0.011   |

**Supplementary Table 2. Multi-variable Cox regression analysis for risk of cancers associated with psoriasis (Male).**

All statistical tests are two-sided and unadjusted for multiple comparisons.

| Cancers                                                                                   | Case/Total   | HR (95%CI)      | p value |
|-------------------------------------------------------------------------------------------|--------------|-----------------|---------|
| Lip, oral cavity and pharynx                                                              |              |                 |         |
| C00 Malignant neoplasm of lip                                                             | 30/219669    | 0.98(0.13,7.21) | 0.983   |
| C02 Malignant neoplasm of other and unspecified parts of tongue                           | 173/219615   | 1.22(0.57,2.60) | 0.609   |
| C03 Malignant neoplasm of gum                                                             | 40/219675    | 0.80(0.11,5.87) | 0.830   |
| C04 Malignant neoplasm of floor of mouth                                                  | 42/219657    | 2.94(1.05,8.27) | 0.040   |
| C06 Malignant neoplasm of other and unspecified parts of mouth                            | 65/219669    | 1.44(0.45,4.61) | 0.535   |
| C07 Malignant neoplasm of parotid gland                                                   | 60/219656    | 1.61(0.50,5.16) | 0.420   |
| C09 Malignant neoplasm of tonsil                                                          | 210/219611   | 0.57(0.21,1.55) | 0.273   |
| C10 Malignant neoplasm of oropharynx                                                      | 80/219663    | 1.09(0.34,3.45) | 0.887   |
| C11 Malignant neoplasm of nasopharynx                                                     | 33/219670    | 0.91(0.13,6.59) | 0.917   |
| C12 Malignant neoplasm of pyriform sinus                                                  | 39/219667    | 1.35(0.33,5.57) | 0.688   |
| C14 Malignant neoplasm of other and ill-defined sites in the lip, oral cavity and pharynx | 71/219666    | 0.75(0.18,3.06) | 0.686   |
| Digestive organs                                                                          |              |                 |         |
| C15 Malignant neoplasm of oesophagus                                                      | 1027/219535  | 0.95(0.68,1.33) | 0.776   |
| C16 Malignant neoplasm of stomach                                                         | 760/219590   | 0.82(0.54,1.26) | 0.367   |
| C17 Malignant neoplasm of small intestine                                                 | 171/219650   | 1.28(0.60,2.73) | 0.523   |
| C18 Malignant neoplasm of colon                                                           | 2533/218984  | 1.00(0.81,1.25) | 0.982   |
| C19 Malignant neoplasm of rectosigmoid junction                                           | 706/219517   | 0.63(0.38,1.06) | 0.080   |
| C20 Malignant neoplasm of rectum                                                          | 1275/219246  | 1.05(0.78,1.42) | 0.740   |
| C21 Malignant neoplasm of anus and anal canal                                             | 91/219652    | 0.67(0.16,2.71) | 0.571   |
| C22 Malignant neoplasm of liver and intrahepatic bile ducts                               | 559/219652   | 1.47(1.01,2.14) | 0.046   |
| C23 Malignant neoplasm of gallbladder                                                     | 46/219682    | 1.34(0.32,5.54) | 0.685   |
| C24 Malignant neoplasm of other and unspecified parts of biliary tract                    | 151/219663   | 0.40(0.10,1.61) | 0.197   |
| C25 Malignant neoplasm of pancreas                                                        | 839/219641   | 1.01(0.70,1.47) | 0.944   |
| C26 Malignant neoplasm of other and ill-defined digestive organs                          | 165/219657   | 0.52(0.17,1.63) | 0.261   |
| Respiratory system and intrathoracic organs                                               |              |                 |         |
| C32 Malignant neoplasm of larynx                                                          | 223/219559   | 1.31(0.70,2.43) | 0.399   |
| C34 Malignant neoplasm of bronchus and lung                                               | 2502/219504  | 1.22(1.01,1.48) | 0.040   |
| C38 Malignant neoplasm of heart, mediastinum and pleura                                   | 55/219681    | 0.56(0.08,4.02) | 0.561   |
| Bone and articular cartilage                                                              |              |                 |         |
| C41 Malignant neoplasm of bone and articular cartilage of other and unspecified sites     | 93/219664    | 0.64(0.18,2.26) | 0.484   |
| Skin                                                                                      |              |                 |         |
| C43 Malignant melanoma of skin                                                            | 1451/219293  | 1.11(0.83,1.48) | 0.497   |
| C44 Other malignant neoplasms of skin                                                     | 9775/217337  | 1.12(1.00,1.25) | 0.041   |
| Mesothelial and soft tissue                                                               |              |                 |         |
| C45 Mesothelioma                                                                          | 378/219675   | 1.53(0.95,2.46) | 0.078   |
| C48 Malignant neoplasm of retroperitoneum and peritoneum                                  | 61/219672    | 0.49(0.07,3.54) | 0.480   |
| C49 Malignant neoplasm of other connective and soft tissue                                | 238/219596   | 0.71(0.31,1.63) | 0.421   |
| Breast                                                                                    |              |                 |         |
| C50 Malignant neoplasm of breast                                                          | 98/219645    | 0.92(0.29,2.92) | 0.893   |
| Male genital organs                                                                       |              |                 |         |
| C60 Malignant neoplasm of penis                                                           | 83/219653    | 3.02(1.45,6.29) | 0.003   |
| C61 Malignant neoplasm of prostate                                                        | 10764/217466 | 0.89(0.80,1.00) | 0.048   |
| C62 Malignant neoplasm of testis                                                          | 109/219448   | 0.91(0.29,2.89) | 0.879   |
| Urinary tract                                                                             |              |                 |         |
| C64 Malignant neoplasm of kidney, except renal pelvis                                     | 1076/219436  | 1.23(0.91,1.67) | 0.177   |
| C66 Malignant neoplasm of ureter                                                          | 128/219664   | 0.67(0.21,2.11) | 0.497   |
| C67 Malignant neoplasm of bladder                                                         | 2276/218934  | 1.23(1.00,1.51) | 0.046   |
| C68 Malignant neoplasm of other and unspecified urinary organs                            | 68/219672    | 1.34(0.42,4.27) | 0.622   |
| Central nervous system                                                                    |              |                 |         |
| C69 Malignant neoplasm of eye and adnexa                                                  | 88/219626    | 0.69(0.17,2.83) | 0.611   |
| C71 Malignant neoplasm of brain                                                           | 555/219633   | 1.06(0.67,1.69) | 0.802   |
| Endocrine glands                                                                          |              |                 |         |
| C73 Malignant neoplasm of thyroid gland                                                   | 130/219629   | 1.43(0.63,3.25) | 0.394   |
| C74 Malignant neoplasm of adrenal gland                                                   | 30/219673    | 2.08(0.48,8.81) | 0.313   |
| Ill-defined, secondary and unspecified sites                                              |              |                 |         |
| C76 Malignant neoplasm of other and ill-defined sites                                     | 75/219655    | 0.63(0.14,2.77) | 0.539   |
| C77 Secondary and unspecified malignant neoplasm of lymph nodes                           | 4157/219201  | 1.04(0.88,1.22) | 0.682   |
| C78 Secondary malignant neoplasm of respiratory and digestive organs                      | 5209/219437  | 0.95(0.81,1.10) | 0.496   |
| C79 Secondary malignant neoplasm of other sites                                           | 4700/219532  | 1.03(0.88,1.20) | 0.702   |
| C80 Malignant neoplasm without specification of site                                      | 1166/219561  | 1.12(0.83,1.51) | 0.473   |
| Lymphoid, haematopoietic and related tissue                                               |              |                 |         |
| C81 Hodgkin's disease                                                                     | 141/219592   | 1.92(0.98,3.79) | 0.058   |
| C82 Follicular [nodular] non-Hodgkin's lymphoma                                           | 272/219564   | 1.33(0.75,2.38) | 0.329   |
| C83 Diffuse non-Hodgkin's lymphoma                                                        | 816/219512   | 1.22(0.86,1.74) | 0.274   |
| C85 Other and unspecified types of non-Hodgkin's lymphoma                                 | 749/219328   | 1.09(0.75,1.61) | 0.645   |
| C86 Other specified types of T/NK-cell lymphoma                                           | 39/219683    | 0.82(0.11,5.99) | 0.846   |

|                                                          |            |                 |       |
|----------------------------------------------------------|------------|-----------------|-------|
| C88 Malignant immunoproliferative diseases               | 135/219670 | 0.97(0.36,2.62) | 0.950 |
| C90 Multiple myeloma and malignant plasma cell neoplasms | 653/219560 | 1.07(0.70,1.63) | 0.769 |
| C91 Lymphoid leukaemia                                   | 631/219495 | 0.87(0.54,1.38) | 0.549 |
| C92 Myeloid leukaemia                                    | 424/219579 | 1.47(0.94,2.30) | 0.094 |
| C94 Other leukaemias of specified cell type              | 37/219683  | 0.81(0.11,5.90) | 0.833 |
| Primary multiple sites                                   |            |                 |       |
| C97 Malignant neoplasms of primary multiple sites        | 757/219682 | 1.38(0.97,1.96) | 0.073 |

---

**Supplementary Table 3. Multi-variable Cox regression analysis for risk of cancers associated with psoriasis (Female).**

All statistical tests are two-sided and unadjusted for multiple comparisons

| Cancers                                                                               | Case/Total   | HR (95%CI)       | p value |
|---------------------------------------------------------------------------------------|--------------|------------------|---------|
| Lip, oral cavity and pharynx                                                          |              |                  |         |
| C00 Malignant neoplasm of lip                                                         | 32/256905    | 2.54(0.60,10.67) | 0.203   |
| C02 Malignant neoplasm of other and unspecified parts of tongue                       | 96/256880    | 1.15(0.36,3.66)  | 0.811   |
| C06 Malignant neoplasm of other and unspecified parts of mouth                        | 30/256901    | 1.23(0.17,9.03)  | 0.839   |
| C07 Malignant neoplasm of parotid gland                                               | 57/256894    | 1.41(0.34,5.81)  | 0.632   |
| C09 Malignant neoplasm of tonsil                                                      | 73/256894    | 0.95(0.23,3.88)  | 0.942   |
| Digestive organs                                                                      |              |                  |         |
| C15 Malignant neoplasm of oesophagus                                                  | 378/256876   | 1.40(0.84,2.33)  | 0.202   |
| C16 Malignant neoplasm of stomach                                                     | 319/256859   | 1.25(0.69,2.29)  | 0.464   |
| C17 Malignant neoplasm of small intestine                                             | 144/256892   | 0.26(0.04,1.83)  | 0.175   |
| C18 Malignant neoplasm of colon                                                       | 2197/256377  | 0.93(0.71,1.22)  | 0.604   |
| C19 Malignant neoplasm of rectosigmoid junction                                       | 401/256776   | 1.14(0.64,2.03)  | 0.649   |
| C20 Malignant neoplasm of rectum                                                      | 765/256645   | 1.32(0.89,1.94)  | 0.165   |
| C21 Malignant neoplasm of anus and anal canal                                         | 177/256866   | 2.27(1.21,4.23)  | 0.010   |
| C22 Malignant neoplasm of liver and intrahepatic bile ducts                           | 344/256899   | 0.81(0.41,1.61)  | 0.552   |
| C23 Malignant neoplasm of gallbladder                                                 | 101/256913   | 0.99(0.31,3.14)  | 0.984   |
| C24 Malignant neoplasm of other and unspecified parts of biliary tract                | 138/256903   | 1.60(0.70,3.65)  | 0.263   |
| C25 Malignant neoplasm of pancreas                                                    | 742/256888   | 0.83(0.52,1.33)  | 0.433   |
| C26 Malignant neoplasm of other and ill-defined digestive organs                      | 120/256894   | 3.17(1.63,6.18)  | 0.001   |
| Respiratory system and intrathoracic organs                                           |              |                  |         |
| C32 Malignant neoplasm of larynx                                                      | 30/256901    | 1.96(0.47,8.27)  | 0.358   |
| C34 Malignant neoplasm of bronchus and lung                                           | 2326/256792  | 1.05(0.84,1.31)  | 0.648   |
| C38 Malignant neoplasm of heart, mediastinum and pleura                               | 38/256910    | 1.95(0.47,8.12)  | 0.360   |
| Bone and articular cartilage                                                          |              |                  |         |
| C41 Malignant neoplasm of bone and articular cartilage of other and unspecified sites | 48/256901    | 1.99(0.57,7.01)  | 0.283   |
| Skin                                                                                  |              |                  |         |
| C43 Malignant melanoma of skin                                                        | 1411/256302  | 1.19(0.86,1.64)  | 0.298   |
| C44 Other malignant neoplasms of skin                                                 | 7695/254577  | 1.09(0.95,1.26)  | 0.227   |
| Mesothelial and soft tissue                                                           |              |                  |         |
| C45 Mesothelioma                                                                      | 96/256915    | 1.55(0.57,4.24)  | 0.389   |
| C48 Malignant neoplasm of retroperitoneum and peritoneum                              | 296/256887   | 1.18(0.60,2.28)  | 0.633   |
| C49 Malignant neoplasm of other connective and soft tissue                            | 161/256846   | 0.73(0.23,2.28)  | 0.586   |
| Breast                                                                                |              |                  |         |
| C50 Malignant neoplasm of breast                                                      | 10075/250439 | 1.24(1.11,1.38)  | < 0.001 |
| Female genital organs                                                                 |              |                  |         |
| C51 Malignant neoplasm of vulva                                                       | 152/256860   | 1.29(0.55,2.99)  | 0.560   |
| C53 Malignant neoplasm of cervix uteri                                                | 185/256718   | 1.51(0.71,3.21)  | 0.288   |
| C54 Malignant neoplasm of corpus uteri                                                | 1638/256272  | 1.23(0.94,1.61)  | 0.135   |
| C55 Malignant neoplasm of uterus, part unspecified                                    | 199/256862   | 0.97(0.40,2.36)  | 0.949   |
| C56 Malignant neoplasm of ovary                                                       | 1269/256470  | 1.20(0.87,1.65)  | 0.258   |
| C57 Malignant neoplasm of other and unspecified female genital organs                 | 232/256894   | 1.19(0.56,2.52)  | 0.653   |
| Urinary tract                                                                         |              |                  |         |
| C64 Malignant neoplasm of kidney, except renal pelvis                                 | 574/256784   | 1.04(0.64,1.68)  | 0.885   |
| C66 Malignant neoplasm of ureter                                                      | 56/256908    | 0.62(0.09,4.48)  | 0.634   |
| C67 Malignant neoplasm of bladder                                                     | 736/256679   | 1.02(0.67,1.56)  | 0.935   |
| Central nervous system                                                                |              |                  |         |
| C69 Malignant neoplasm of eye and adnexa                                              | 69/256852    | 0.52(0.07,3.76)  | 0.518   |
| C71 Malignant neoplasm of brain                                                       | 412/256869   | 0.80(0.41,1.57)  | 0.520   |
| Endocrine glands                                                                      |              |                  |         |
| C73 Malignant neoplasm of thyroid gland                                               | 324/256749   | 0.24(0.06,0.96)  | 0.043   |
| Ill-defined, secondary and unspecified sites                                          |              |                  |         |
| C76 Malignant neoplasm of other and ill-defined sites                                 | 93/256889    | 0.41(0.06,2.97)  | 0.380   |
| C77 Secondary and unspecified malignant neoplasm of lymph nodes                       | 5477/255380  | 1.20(1.03,1.39)  | 0.018   |
| C78 Secondary malignant neoplasm of respiratory and digestive organs                  | 5873/256586  | 0.95(0.81,1.11)  | 0.526   |
| C79 Secondary malignant neoplasm of other sites                                       | 4258/256647  | 0.89(0.74,1.08)  | 0.245   |
| C80 Malignant neoplasm without specification of site                                  | 1288/256768  | 0.78(0.54,1.13)  | 0.191   |
| Lymphoid, haematopoietic and related tissue                                           |              |                  |         |
| C81 Hodgkin's disease                                                                 | 121/256844   | 0.90(0.29,2.84)  | 0.859   |
| C82 Follicular [nodular] non-Hodgkin's lymphoma                                       | 305/256806   | 0.35(0.11,1.08)  | 0.067   |
| C83 Diffuse non-Hodgkin's lymphoma                                                    | 619/256817   | 1.09(0.68,1.75)  | 0.724   |
| C85 Other and unspecified types of non-Hodgkin's lymphoma                             | 618/256631   | 0.95(0.58,1.57)  | 0.848   |
| C88 Malignant immunoproliferative diseases                                            | 101/256902   | 0.38(0.05,2.76)  | 0.341   |
| C90 Multiple myeloma and malignant plasma cell neoplasms                              | 470/256836   | 0.97(0.54,1.73)  | 0.913   |
| C91 Lymphoid leukaemia                                                                | 347/256829   | 1.01(0.52,1.96)  | 0.980   |
| C92 Myeloid leukaemia                                                                 | 303/256814   | 1.12(0.58,2.18)  | 0.729   |
| Primary multiple sites                                                                |              |                  |         |
| C97 Malignant neoplasms of primary multiple sites                                     | 525/256912   | 1.50(0.97,2.34)  | 0.070   |

**Supplementary Table 4. Multi-variable Cox regression analysis for risk of exclusive cancer diagnoses associated with psoriasis (Whole population).**

| <b>Cancers</b>                                              | <b>Case/Total</b> | <b>HR (95%CI)</b> | <b>p value</b> |
|-------------------------------------------------------------|-------------------|-------------------|----------------|
| C15 Malignant neoplasm of oesophagus                        | 161/437716        | 1.87(0.99,3.56)   | 0.055          |
| C16 Malignant neoplasm of stomach                           | 108/437716        | 0.58(0.14,2.36)   | 0.449          |
| C18 Malignant neoplasm of colon                             | 1366/437405       | 1.08(0.80,1.46)   | 0.614          |
| C19 Malignant neoplasm of rectosigmoid junction             | 109/437695        | 0.31(0.04,2.24)   | 0.247          |
| C20 Malignant neoplasm of rectum                            | 698/437489        | 1.25(0.85,1.85)   | 0.260          |
| C22 Malignant neoplasm of liver and intrahepatic bile ducts | 242/437740        | 1.28(0.69,2.38)   | 0.431          |
| C25 Malignant neoplasm of pancreas                          | 182/437741        | 1.17(0.54,2.54)   | 0.695          |
| C34 Malignant neoplasm of bronchus and lung                 | 804/437688        | 1.56(1.14,2.12)   | 0.005          |
| C43 Malignant melanoma of skin                              | 1448/437205       | 1.15(0.84,1.56)   | 0.388          |
| C44 Other malignant neoplasms of skin                       | 11060/435315      | 1.10(0.98,1.23)   | 0.102          |
| C45 Mesothelioma                                            | 132/437752        | 0.99(0.37,2.69)   | 0.992          |
| C49 Malignant neoplasm of other connective and soft tissue  | 136/437682        | 1.31(0.54,3.21)   | 0.552          |
| C50 Malignant neoplasm of breast                            | 5202/434375       | 1.28(1.09,1.49)   | 0.002          |
| C64 Malignant neoplasm of kidney, except renal pelvis       | 662/437575        | 1.15(0.76,1.74)   | 0.522          |
| C67 Malignant neoplasm of bladder                           | 1251/437331       | 1.24(0.93,1.65)   | 0.142          |
| C71 Malignant neoplasm of brain                             | 399/437726        | 1.88(1.21,2.93)   | 0.005          |
| C73 Malignant neoplasm of thyroid gland                     | 244/437613        | 0.31(0.08,1.25)   | 0.101          |
| C82 Follicular [nodular] non-Hodgkin's lymphoma             | 130/437721        | 1.10(0.41,2.99)   | 0.848          |
| C83 Diffuse non-Hodgkin's lymphoma                          | 375/437724        | 1.13(0.64,2.01)   | 0.671          |
| C85 Other and unspecified types of non-Hodgkin's lymphoma   | 189/437646        | 1.14(0.50,2.57)   | 0.756          |
| C90 Multiple myeloma and malignant plasma cell neoplasms    | 626/437664        | 1.38(0.92,2.06)   | 0.115          |
| C91 Lymphoid leukaemia                                      | 457/437660        | 0.94(0.54,1.64)   | 0.830          |
| C92 Myeloid leukaemia                                       | 350/437662        | 1.37(0.80,2.34)   | 0.251          |

All statistical tests are two-sided and unadjusted for multiple comparisons.

**Supplementary Table 5. Multi-variable Cox regression analysis for risk of exclusive cancer diagnoses associated with psoriasis (Male).**

| <b>Cancers</b>                                              | <b>Case/Total</b> | <b>HR (95%CI)</b> | <b>p value</b> |
|-------------------------------------------------------------|-------------------|-------------------|----------------|
| C15 Malignant neoplasm of oesophagus                        | 104/200514        | 1.31(0.53,3.21)   | 0.558          |
| C18 Malignant neoplasm of colon                             | 702/200347        | 1.44(1.01,2.05)   | 0.043          |
| C20 Malignant neoplasm of rectum                            | 426/200379        | 1.30(0.81,2.09)   | 0.275          |
| C22 Malignant neoplasm of liver and intrahepatic bile ducts | 173/200534        | 1.46(0.74,2.85)   | 0.273          |
| C34 Malignant neoplasm of bronchus and lung                 | 374/200503        | 1.70(1.11,2.61)   | 0.015          |
| C43 Malignant melanoma of skin                              | 629/200366        | 1.42(0.95,2.12)   | 0.086          |
| C44 Other malignant neoplasms of skin                       | 5844/199456       | 1.12(0.97,1.30)   | 0.119          |
| C45 Mesothelioma                                            | 101/200542        | 0.92(0.29,2.91)   | 0.891          |
| C61 Malignant neoplasm of prostate                          | 7216/199116       | 0.94(0.82,1.07)   | 0.350          |
| C64 Malignant neoplasm of kidney, except renal pelvis       | 402/200433        | 1.25(0.76,2.07)   | 0.379          |
| C67 Malignant neoplasm of bladder                           | 896/200227        | 1.29(0.93,1.79)   | 0.122          |
| C71 Malignant neoplasm of brain                             | 221/200533        | 2.13(1.24,3.66)   | 0.006          |
| C83 Diffuse non-Hodgkin's lymphoma                          | 195/200528        | 0.84(0.34,2.04)   | 0.696          |
| C90 Multiple myeloma and malignant plasma cell neoplasms    | 329/200497        | 1.57(0.95,2.59)   | 0.081          |
| C91 Lymphoid leukaemia                                      | 275/200480        | 0.86(0.42,1.76)   | 0.674          |
| C92 Myeloid leukaemia                                       | 194/200501        | 1.48(0.76,2.89)   | 0.252          |

All statistical tests are two-sided and unadjusted for multiple comparisons.

**Supplementary Table 6. Multi-variable Cox regression analysis for risk of exclusive cancer diagnoses associated with psoriasis (Female).**

| <b>Cancers</b>                                            | <b>Case/Total</b> | <b>HR (95%CI)</b> | <b>p value</b> |
|-----------------------------------------------------------|-------------------|-------------------|----------------|
| C18 Malignant neoplasm of colon                           | 664/237058        | 0.62(0.34,1.13)   | 0.121          |
| C20 Malignant neoplasm of rectum                          | 272/237110        | 1.13(0.56,2.28)   | 0.742          |
| C34 Malignant neoplasm of bronchus and lung               | 430/237185        | 1.42(0.90,2.24)   | 0.127          |
| C43 Malignant melanoma of skin                            | 819/236839        | 0.89(0.55,1.45)   | 0.637          |
| C44 Other malignant neoplasms of skin                     | 5216/235859       | 1.05(0.88,1.26)   | 0.572          |
| C50 Malignant neoplasm of breast                          | 5162/233840       | 1.26(1.08,1.48)   | 0.003          |
| C54 Malignant neoplasm of corpus uteri                    | 910/236832        | 1.23(0.86,1.76)   | 0.263          |
| C56 Malignant neoplasm of ovary                           | 258/237008        | 1.10(0.52,2.33)   | 0.807          |
| C64 Malignant neoplasm of kidney, except renal pelvis     | 260/237142        | 0.96(0.45,2.03)   | 0.905          |
| C67 Malignant neoplasm of bladder                         | 355/237104        | 1.09(0.60,1.99)   | 0.781          |
| C71 Malignant neoplasm of brain                           | 178/237193        | 1.55(0.73,3.30)   | 0.257          |
| C83 Diffuse non-Hodgkin's lymphoma                        | 180/237196        | 1.51(0.71,3.22)   | 0.284          |
| C85 Other and unspecified types of non-Hodgkin's lymphoma | 106/237154        | 0.74(0.18,3.02)   | 0.680          |
| C90 Multiple myeloma and malignant plasma cell neoplasms  | 297/237167        | 1.13(0.58,2.22)   | 0.715          |
| C91 Lymphoid leukaemia                                    | 182/237180        | 1.10(0.45,2.67)   | 0.840          |
| C92 Myeloid leukaemia                                     | 156/237161        | 1.22(0.50,2.97)   | 0.666          |

All statistical tests are two-sided and unadjusted for multiple comparisons.



**Supplementary Table 7. Multi-variable logistic regression analysis for risk of cancers associated with psoriasis PRSs (Whole population).**

All statistical tests are two-sided and unadjusted for multiple comparisons.

| Cancer                                                                                    | Case/Total   | OR (95%CI)      | p value |
|-------------------------------------------------------------------------------------------|--------------|-----------------|---------|
| Lip, oral cavity and pharynx                                                              |              |                 |         |
| C00 Malignant neoplasm of lip                                                             | 51/387698    | 1.02(0.97,1.08) | 0.436   |
| C02 Malignant neoplasm of other and unspecified parts of tongue                           | 211/387629   | 1.01(0.98,1.04) | 0.369   |
| C03 Malignant neoplasm of gum                                                             | 52/387708    | 1.04(0.99,1.10) | 0.147   |
| C06 Malignant neoplasm of other and unspecified parts of mouth                            | 76/387696    | 0.97(0.93,1.02) | 0.222   |
| C07 Malignant neoplasm of parotid gland                                                   | 90/387679    | 0.96(0.92,1.00) | 0.068   |
| C09 Malignant neoplasm of tonsil                                                          | 241/387640   | 1.00(0.97,1.02) | 0.796   |
| C10 Malignant neoplasm of oropharynx                                                      | 81/387699    | 0.99(0.94,1.03) | 0.518   |
| C14 Malignant neoplasm of other and ill-defined sites in the lip, oral cavity and pharynx | 74/387703    | 0.99(0.95,1.04) | 0.794   |
| Digestive organs                                                                          |              |                 |         |
| C15 Malignant neoplasm of oesophagus                                                      | 1246/387562  | 1.00(0.98,1.01) | 0.542   |
| C16 Malignant neoplasm of stomach                                                         | 909/387605   | 1.00(0.99,1.02) | 0.591   |
| C17 Malignant neoplasm of small intestine                                                 | 258/387665   | 1.00(0.97,1.02) | 0.770   |
| C18 Malignant neoplasm of colon                                                           | 3972/386681  | 1.00(0.99,1.01) | 0.941   |
| C19 Malignant neoplasm of rectosigmoid junction                                           | 922/387460   | 1.00(0.98,1.01) | 0.846   |
| C20 Malignant neoplasm of rectum                                                          | 1724/387095  | 1.00(0.99,1.01) | 0.440   |
| C21 Malignant neoplasm of anus and anal canal                                             | 225/387646   | 1.02(0.99,1.05) | 0.225   |
| C22 Malignant neoplasm of liver and intrahepatic bile ducts                               | 745/387682   | 1.00(0.99,1.02) | 0.532   |
| C23 Malignant neoplasm of gallbladder                                                     | 122/387713   | 1.01(0.97,1.05) | 0.667   |
| C24 Malignant neoplasm of other and unspecified parts of biliary tract                    | 250/387689   | 0.99(0.97,1.02) | 0.624   |
| C25 Malignant neoplasm of pancreas                                                        | 1308/387657  | 0.99(0.98,1.00) | 0.250   |
| C26 Malignant neoplasm of other and ill-defined digestive organs                          | 237/387680   | 1.00(0.98,1.03) | 0.839   |
| Respiratory system and intrathoracic organs                                               |              |                 |         |
| C32 Malignant neoplasm of larynx                                                          | 219/387595   | 0.99(0.96,1.02) | 0.564   |
| C34 Malignant neoplasm of bronchus and lung                                               | 3950/387475  | 1.01(1.00,1.01) | 0.022   |
| C38 Malignant neoplasm of heart, mediastinum and pleura                                   | 79/387712    | 0.99(0.94,1.03) | 0.577   |
| Bone and articular cartilage                                                              |              |                 |         |
| C41 Malignant neoplasm of bone and articular cartilage of other and unspecified sites     | 110/387687   | 0.99(0.95,1.03) | 0.499   |
| Skin                                                                                      |              |                 |         |
| C43 Malignant melanoma of skin                                                            | 2512/386832  | 1.00(0.99,1.00) | 0.294   |
| C44 Other malignant neoplasms of skin                                                     | 15419/383570 | 1.00(1.00,1.00) | 0.513   |
| Mesothelial and soft tissue                                                               |              |                 |         |
| C45 Mesothelioma                                                                          | 422/387709   | 0.99(0.97,1.01) | 0.541   |
| C48 Malignant neoplasm of retroperitoneum and peritoneum                                  | 302/387684   | 0.99(0.97,1.02) | 0.659   |
| C49 Malignant neoplasm of other connective and soft tissue                                | 322/387594   | 0.98(0.96,1.01) | 0.153   |
| Breast                                                                                    |              |                 |         |
| C50 Malignant neoplasm of breast                                                          | 8338/382505  | 1.01(1.00,1.01) | 0.024   |
| Urinary tract                                                                             |              |                 |         |
| C64 Malignant neoplasm of kidney, except renal pelvis                                     | 1390/387387  | 1.02(1.01,1.03) | 0.003   |
| C66 Malignant neoplasm of ureter                                                          | 164/387694   | 1.01(0.98,1.05) | 0.463   |
| C67 Malignant neoplasm of bladder                                                         | 2569/386884  | 1.00(0.99,1.01) | 0.591   |
| C68 Malignant neoplasm of other and unspecified urinary organs                            | 63/387703    | 0.99(0.93,1.04) | 0.618   |
| Central nervous system                                                                    |              |                 |         |
| C69 Malignant neoplasm of eye and adnexa                                                  | 132/387616   | 1.00(0.97,1.04) | 0.915   |
| C71 Malignant neoplasm of brain                                                           | 795/387637   | 1.00(0.98,1.01) | 0.574   |
| Endocrine glands                                                                          |              |                 |         |
| C73 Malignant neoplasm of thyroid gland                                                   | 336/387541   | 0.99(0.97,1.01) | 0.434   |
| Ill-defined, secondary and unspecified sites                                              |              |                 |         |
| C76 Malignant neoplasm of other and ill-defined sites                                     | 139/387677   | 0.97(0.94,1.00) | 0.092   |
| C77 Secondary and unspecified malignant neoplasm of lymph nodes                           | 7952/386082  | 1.00(1.00,1.01) | 0.513   |
| C78 Secondary malignant neoplasm of respiratory and digestive organs                      | 9224/387252  | 1.00(1.00,1.01) | 0.174   |
| C79 Secondary malignant neoplasm of other sites                                           | 7427/387372  | 1.01(1.00,1.01) | 0.031   |
| C80 Malignant neoplasm without specification of site                                      | 2034/387504  | 1.01(1.00,1.02) | 0.202   |
| Lymphoid, haematopoietic and related tissue                                               |              |                 |         |
| C81 Hodgkin's disease                                                                     | 210/387592   | 0.98(0.96,1.01) | 0.226   |
| C82 Follicular [nodular] non-Hodgkin's lymphoma                                           | 475/387536   | 1.02(1.00,1.04) | 0.027   |
| C83 Diffuse non-Hodgkin's lymphoma                                                        | 1188/387484  | 1.00(0.99,1.01) | 0.574   |
| C85 Other and unspecified types of non-Hodgkin's lymphoma                                 | 1131/387185  | 0.99(0.98,1.00) | 0.223   |
| C88 Malignant immunoproliferative diseases                                                | 196/387694   | 0.98(0.95,1.00) | 0.095   |
| C90 Multiple myeloma and malignant plasma cell neoplasms                                  | 916/387546   | 0.99(0.98,1.01) | 0.388   |
| C91 Lymphoid leukaemia                                                                    | 814/387482   | 0.99(0.98,1.00) | 0.170   |
| C92 Myeloid leukaemia                                                                     | 619/387540   | 1.00(0.99,1.02) | 0.732   |
| Primary multiple sites                                                                    |              |                 |         |
| C97 Malignant neoplasms of primary multiple sites                                         | 1133/387717  | 1.00(0.99,1.02) | 0.671   |

**Supplementary Table 8. Multi-variable logistic regression analysis for risk of cancers associated with psoriasis PRs (Male).**

All statistical tests are two-sided and unadjusted for multiple comparisons.

| Cancer                                                                                    | Case/Total  | OR (95%CI)      | p value |
|-------------------------------------------------------------------------------------------|-------------|-----------------|---------|
| Lip, oral cavity and pharynx                                                              |             |                 |         |
| C02 Malignant neoplasm of other and unspecified parts of tongue                           | 140/179956  | 0.99(0.96,1.03) | 0.781   |
| C03 Malignant neoplasm of gum                                                             | 31/180008   | 1.02(0.94,1.09) | 0.690   |
| C04 Malignant neoplasm of floor of mouth                                                  | 32/179995   | 1.00(0.93,1.08) | 0.982   |
| C06 Malignant neoplasm of other and unspecified parts of mouth                            | 49/180005   | 0.95(0.89,1.01) | 0.106   |
| C07 Malignant neoplasm of parotid gland                                                   | 51/179993   | 0.98(0.92,1.04) | 0.451   |
| C09 Malignant neoplasm of tonsil                                                          | 182/179957  | 0.99(0.96,1.02) | 0.635   |
| C10 Malignant neoplasm of oropharynx                                                      | 63/180001   | 0.97(0.93,1.03) | 0.319   |
| C14 Malignant neoplasm of other and ill-defined sites in the lip, oral cavity and pharynx | 56/180004   | 0.99(0.94,1.05) | 0.839   |
| Digestive organs                                                                          |             |                 |         |
| C15 Malignant neoplasm of oesophagus                                                      | 908/179894  | 0.99(0.98,1.01) | 0.453   |
| C16 Malignant neoplasm of stomach                                                         | 647/179942  | 1.00(0.98,1.02) | 0.904   |
| C17 Malignant neoplasm of small intestine                                                 | 143/179987  | 1.00(0.97,1.04) | 0.817   |
| C18 Malignant neoplasm of colon                                                           | 2164/179419 | 1.00(0.99,1.01) | 0.819   |
| C19 Malignant neoplasm of rectosigmoid junction                                           | 590/179873  | 1.00(0.98,1.02) | 0.946   |
| C20 Malignant neoplasm of rectum                                                          | 1092/179627 | 1.01(1.00,1.02) | 0.143   |
| C21 Malignant neoplasm of anus and anal canal                                             | 72/179989   | 1.00(0.95,1.05) | 0.972   |
| C22 Malignant neoplasm of liver and intrahepatic bile ducts                               | 466/179992  | 1.01(0.99,1.03) | 0.255   |
| C23 Malignant neoplasm of gallbladder                                                     | 40/180014   | 1.04(0.97,1.11) | 0.240   |
| C24 Malignant neoplasm of other and unspecified parts of biliary tract                    | 131/179999  | 0.99(0.95,1.02) | 0.450   |
| C25 Malignant neoplasm of pancreas                                                        | 696/179980  | 1.00(0.99,1.02) | 0.882   |
| C26 Malignant neoplasm of other and ill-defined digestive organs                          | 138/179995  | 1.00(0.96,1.03) | 0.920   |
| Respiratory system and intrathoracic organs                                               |             |                 |         |
| C32 Malignant neoplasm of larynx                                                          | 193/179907  | 1.00(0.97,1.03) | 0.895   |
| C34 Malignant neoplasm of bronchus and lung                                               | 2076/179871 | 1.01(1.00,1.02) | 0.028   |
| C38 Malignant neoplasm of heart, mediastinum and pleura                                   | 49/180014   | 1.00(0.94,1.06) | 0.899   |
| Bone and articular cartilage                                                              |             |                 |         |
| C41 Malignant neoplasm of bone and articular cartilage of other and unspecified sites     | 72/179999   | 1.00(0.95,1.05) | 0.998   |
| Skin                                                                                      |             |                 |         |
| C43 Malignant melanoma of skin                                                            | 1255/179666 | 1.00(0.99,1.01) | 0.864   |
| C44 Other malignant neoplasms of skin                                                     | 8662/177919 | 1.00(0.99,1.00) | 0.648   |
| Mesothelial and soft tissue                                                               |             |                 |         |
| C45 Mesothelioma                                                                          | 340/180008  | 0.99(0.97,1.01) | 0.291   |
| C48 Malignant neoplasm of retroperitoneum and peritoneum                                  | 54/180008   | 0.99(0.94,1.05) | 0.792   |
| C49 Malignant neoplasm of other connective and soft tissue                                | 193/179950  | 0.97(0.94,1.00) | 0.037   |
| Breast                                                                                    |             |                 |         |
| C50 Malignant neoplasm of breast                                                          | 79/179981   | 0.98(0.93,1.03) | 0.370   |
| Male genital organs                                                                       |             |                 |         |
| C60 Malignant neoplasm of penis                                                           | 67/179989   | 0.95(0.91,1.00) | 0.057   |
| C61 Malignant neoplasm of prostate                                                        | 8956/178110 | 1.00(1.00,1.01) | 0.404   |
| C62 Malignant neoplasm of testis                                                          | 87/179814   | 1.02(0.97,1.06) | 0.423   |
| Urinary tract                                                                             |             |                 |         |
| C64 Malignant neoplasm of kidney, except renal pelvis                                     | 908/179794  | 1.02(1.01,1.03) | 0.003   |
| C66 Malignant neoplasm of ureter                                                          | 112/179999  | 1.02(0.98,1.06) | 0.424   |
| C67 Malignant neoplasm of bladder                                                         | 1947/179368 | 1.00(0.99,1.01) | 0.838   |
| C68 Malignant neoplasm of other and unspecified urinary organs                            | 54/180003   | 0.98(0.93,1.04) | 0.572   |
| Central nervous system                                                                    |             |                 |         |
| C69 Malignant neoplasm of eye and adnexa                                                  | 76/179966   | 1.02(0.97,1.07) | 0.442   |
| C71 Malignant neoplasm of brain                                                           | 453/179977  | 0.99(0.98,1.01) | 0.605   |
| Endocrine glands                                                                          |             |                 |         |
| C73 Malignant neoplasm of thyroid gland                                                   | 102/179972  | 1.01(0.97,1.05) | 0.768   |
| Ill-defined, secondary and unspecified sites                                              |             |                 |         |
| C76 Malignant neoplasm of other and ill-defined sites                                     | 60/179995   | 0.96(0.92,1.01) | 0.152   |
| C77 Secondary and unspecified malignant neoplasm of lymph nodes                           | 3504/179598 | 1.00(0.99,1.01) | 0.766   |
| C78 Secondary malignant neoplasm of respiratory and digestive organs                      | 4412/179817 | 1.01(1.00,1.01) | 0.040   |
| C79 Secondary malignant neoplasm of other sites                                           | 3984/179887 | 1.00(1.00,1.01) | 0.169   |
| C80 Malignant neoplasm without specification of site                                      | 975/179918  | 1.01(1.00,1.02) | 0.198   |
| Lymphoid, haematopoietic and related tissue                                               |             |                 |         |
| C81 Hodgkin's disease                                                                     | 118/179946  | 0.99(0.95,1.03) | 0.529   |
| C82 Follicular [nodular] non-Hodgkin's lymphoma                                           | 225/179916  | 1.02(0.99,1.04) | 0.218   |
| C83 Diffuse non-Hodgkin's lymphoma                                                        | 689/179867  | 0.99(0.98,1.01) | 0.325   |
| C85 Other and unspecified types of non-Hodgkin's lymphoma                                 | 632/179708  | 1.00(0.98,1.01) | 0.712   |
| C86 Other specified types of T/NK-cell lymphoma                                           | 32/180015   | 1.04(0.96,1.12) | 0.313   |
| C88 Malignant immunoproliferative diseases                                                | 109/180003  | 0.96(0.93,1.00) | 0.059   |
| C90 Multiple myeloma and malignant plasma cell neoplasms                                  | 545/179909  | 1.00(0.98,1.02) | 0.987   |
| C91 Lymphoid leukaemia                                                                    | 522/179852  | 0.99(0.98,1.01) | 0.526   |
| C92 Myeloid leukaemia                                                                     | 369/179929  | 1.01(0.99,1.04) | 0.189   |
| C94 Other leukaemias of specified cell type                                               | 30/180015   | 1.00(0.93,1.07) | 0.934   |
| Primary multiple sites                                                                    |             |                 |         |
| C97 Malignant neoplasms of independent primary multiple sites                             | 677/180015  | 1.00(0.99,1.02) | 0.720   |

**Supplementary Table 9. Multi-variable logistic regression analysis for risk of cancers associated with psoriasis PRSs (Female).**

All statistical tests are two-sided and unadjusted for multiple comparisons.

| Cancer                                                                                | Case/Total  | OR (95%CI)      | p value |
|---------------------------------------------------------------------------------------|-------------|-----------------|---------|
| Lip, oral cavity and pharynx                                                          |             |                 |         |
| C00 Malignant neoplasm of lip                                                         | 31/207693   | 1.04(0.96,1.11) | 0.336   |
| C02 Malignant neoplasm of other and unspecified parts of tongue                       | 71/207673   | 1.04(1.00,1.09) | 0.065   |
| C06 Malignant neoplasm of other and unspecified parts of mouth                        | 27/207691   | 1.00(0.93,1.08) | 0.921   |
| C07 Malignant neoplasm of parotid gland                                               | 39/207686   | 0.94(0.88,1.00) | 0.061   |
| C09 Malignant neoplasm of tonsil                                                      | 59/207683   | 1.01(0.96,1.06) | 0.767   |
| Digestive organs                                                                      |             |                 |         |
| C15 Malignant neoplasm of oesophagus                                                  | 338/207668  | 1.00(0.98,1.02) | 0.931   |
| C16 Malignant neoplasm of stomach                                                     | 262/207663  | 1.01(0.99,1.04) | 0.416   |
| C17 Malignant neoplasm of small intestine                                             | 115/207678  | 0.99(0.95,1.02) | 0.493   |
| C18 Malignant neoplasm of colon                                                       | 1808/207262 | 1.00(0.99,1.01) | 0.747   |
| C19 Malignant neoplasm of rectosigmoid junction                                       | 332/207587  | 1.00(0.97,1.02) | 0.701   |
| C20 Malignant neoplasm of rectum                                                      | 632/207468  | 0.99(0.98,1.01) | 0.522   |
| C21 Malignant neoplasm of anus and anal canal                                         | 153/207657  | 1.03(0.99,1.06) | 0.139   |
| C22 Malignant neoplasm of liver and intrahepatic bile ducts                           | 279/207690  | 1.00(0.97,1.02) | 0.694   |
| C23 Malignant neoplasm of gallbladder                                                 | 82/207699   | 0.99(0.95,1.04) | 0.786   |
| C24 Malignant neoplasm of other and unspecified parts of biliary tract                | 119/207690  | 1.00(0.96,1.04) | 0.911   |
| C25 Malignant neoplasm of pancreas                                                    | 612/207677  | 0.98(0.97,1.00) | 0.065   |
| C26 Malignant neoplasm of other and ill-defined digestive organs                      | 99/207685   | 1.01(0.97,1.05) | 0.657   |
| Respiratory system and intrathoracic organs                                           |             |                 |         |
| C32 Malignant neoplasm of larynx                                                      | 26/207688   | 0.95(0.87,1.03) | 0.184   |
| C34 Malignant neoplasm of bronchus and lung                                           | 1874/207604 | 1.00(1.00,1.01) | 0.325   |
| C38 Malignant neoplasm of heart, mediastinum and pleura                               | 30/207698   | 0.97(0.90,1.04) | 0.413   |
| Bone and articular cartilage                                                          |             |                 |         |
| C41 Malignant neoplasm of bone and articular cartilage of other and unspecified sites | 38/207688   | 0.96(0.90,1.03) | 0.259   |
| Skin                                                                                  |             |                 |         |
| C43 Malignant melanoma of skin                                                        | 1257/207166 | 0.99(0.98,1.00) | 0.094   |
| C44 Other malignant neoplasms of skin                                                 | 6757/205651 | 1.00(1.00,1.01) | 0.138   |
| Mesothelial and soft tissue                                                           |             |                 |         |
| C45 Mesothelioma                                                                      | 82/207701   | 1.02(0.97,1.07) | 0.428   |
| C48 Malignant neoplasm of retroperitoneum and peritoneum                              | 248/207676  | 1.00(0.97,1.02) | 0.718   |
| C49 Malignant neoplasm of other connective and soft tissue                            | 129/207644  | 1.00(0.97,1.04) | 0.795   |
| Breast                                                                                |             |                 |         |
| C50 Malignant neoplasm of breast                                                      | 8259/202524 | 1.01(1.00,1.01) | 0.018   |
| Female genital organs                                                                 |             |                 |         |
| C51 Malignant neoplasm of vulva                                                       | 130/207658  | 1.01(0.98,1.05) | 0.488   |
| C53 Malignant neoplasm of cervix uteri                                                | 147/207547  | 0.98(0.95,1.01) | 0.224   |
| C54 Malignant neoplasm of corpus uteri                                                | 1341/207173 | 1.00(0.99,1.01) | 0.709   |
| C55 Malignant neoplasm of uterus, part unspecified                                    | 150/207658  | 0.98(0.95,1.01) | 0.266   |
| C56 Malignant neoplasm of ovary                                                       | 1024/207325 | 1.00(0.98,1.01) | 0.692   |
| C57 Malignant neoplasm of other and unspecified female genital organs                 | 192/207689  | 1.00(0.97,1.03) | 0.768   |
| Urinary tract                                                                         |             |                 |         |
| C64 Malignant neoplasm of kidney, except renal pelvis                                 | 482/207593  | 1.01(0.99,1.03) | 0.277   |
| C66 Malignant neoplasm of ureter                                                      | 52/207695   | 1.00(0.95,1.06) | 0.888   |
| C67 Malignant neoplasm of bladder                                                     | 622/207516  | 1.01(0.99,1.02) | 0.471   |
| Central nervous system                                                                |             |                 |         |
| C69 Malignant neoplasm of eye and adnexa                                              | 56/207650   | 0.98(0.93,1.04) | 0.522   |
| C71 Malignant neoplasm of brain                                                       | 342/207660  | 1.00(0.97,1.02) | 0.790   |
| Endocrine glands                                                                      |             |                 |         |
| C73 Malignant neoplasm of thyroid gland                                               | 234/207569  | 0.98(0.96,1.01) | 0.261   |
| Ill-defined, secondary and unspecified sites                                          |             |                 |         |
| C76 Malignant neoplasm of other and ill-defined sites                                 | 79/207682   | 0.98(0.93,1.02) | 0.322   |
| C77 Secondary and unspecified malignant neoplasm of lymph nodes                       | 4448/206484 | 1.00(1.00,1.01) | 0.529   |
| C78 Secondary malignant neoplasm of respiratory and digestive organs                  | 4812/207435 | 1.00(0.99,1.01) | 0.961   |
| C79 Secondary malignant neoplasm of other sites                                       | 3443/207485 | 1.01(1.00,1.01) | 0.092   |
| C80 Malignant neoplasm without specification of site                                  | 1059/207586 | 1.00(0.99,1.02) | 0.597   |
| Lymphoid, haematopoietic and related tissue                                           |             |                 |         |
| C81 Hodgkin's disease                                                                 | 92/207646   | 0.98(0.94,1.02) | 0.277   |
| C82 Follicular [nodular] non-Hodgkin's lymphoma                                       | 250/207620  | 1.02(1.00,1.05) | 0.060   |
| C83 Diffuse non-Hodgkin's lymphoma                                                    | 499/207617  | 1.00(0.98,1.02) | 0.796   |
| C85 Other and unspecified types of non-Hodgkin's lymphoma                             | 499/207477  | 0.99(0.97,1.01) | 0.162   |
| C88 Malignant immunoproliferative diseases                                            | 87/207691   | 0.99(0.95,1.04) | 0.684   |
| C90 Multiple myeloma and malignant plasma cell neoplasms                              | 371/207637  | 0.99(0.96,1.01) | 0.185   |
| C91 Lymphoid leukaemia                                                                | 292/207630  | 0.98(0.96,1.01) | 0.154   |
| C92 Myeloid leukaemia                                                                 | 250/207611  | 0.99(0.96,1.01) | 0.310   |
| Primary multiple sites                                                                |             |                 |         |
| C97 Malignant neoplasms of independent primary multiple sites                         | 456/207702  | 1.00(0.98,1.02) | 0.812   |

Supplementary Table 10. Tests of heterogeneity for psoriasis as the exposure and cancers as the outcome.

| Outcomes                                                         | Heterogeneity test |                |              |                |
|------------------------------------------------------------------|--------------------|----------------|--------------|----------------|
|                                                                  | MR Egger           |                | IVW          |                |
|                                                                  | Q-statistics       | <i>p</i> value | Q-statistics | <i>p</i> value |
| Anal canal cancer                                                | 6.37               | 0.702          | 6.42         | 0.779          |
| Lung cancer                                                      | 9.41               | 0.225          | 9.49         | 0.303          |
| Nonmelanoma skin cancer                                          | 12.73              | 0.239          | 15.74        | 0.151          |
| Breast cancer                                                    | 7.04               | 0.933          | 7.49         | 0.943          |
| Kidney cancer                                                    | 13.13              | 0.069          | 15.13        | 0.057          |
| Secondary malignant neoplasm of respiratory and digestive organs | 5.61               | 0.847          | 5.61         | 0.898          |
| Secondary malignant neoplasm of other sites                      | 4.32               | 0.932          | 6.52         | 0.837          |
| Follicular [nodular] non-Hodgkin's lymphoma                      | 6.98               | 0.639          | 11.39        | 0.328          |

All statistical tests are two-sided. Abbreviation: MR-Egger, Mendelian Randomisation-Egger. IVW, Inverse variance weighted.

**Supplementary Table 11. Tests of pleiotropy for psoriasis as the exposure and cancers as the outcome.**

| <b>Outcomes</b>                                                  | <b>Pleiotropy test</b>             |                                     |
|------------------------------------------------------------------|------------------------------------|-------------------------------------|
|                                                                  | <b>MR-Egger<br/><i>p</i> value</b> | <b>MR-PRESSO<br/><i>p</i> value</b> |
| Anal canal cancer                                                | 0.839                              | 0.873                               |
| Lung cancer                                                      | 0.815                              | 0.160                               |
| Nonmelanoma skin cancer                                          | 0.155                              | 0.064                               |
| Breast cancer                                                    | 0.512                              | 0.111                               |
| Kidney cancer                                                    | 0.335                              | 0.210                               |
| Secondary malignant neoplasm of respiratory and digestive organs | 0.975                              | 0.798                               |
| Secondary malignant neoplasm of other sites                      | 0.169                              | 0.584                               |
| Follicular [nodular] non-Hodgkin's lymphoma                      | 0.065                              | 0.347                               |

All statistical tests are two-sided. Abbreviation: MR-Egger, Mendelian Randomisation-Egger. MR-PRESSO, MR-pleiotropy residual sum and outlier.

**Supplementary Table 12. The association of SNPs included as the instrument variables in two-sample Mendelian randomization analysis with breast and lung cancer.**

| SNP         | Lung cancer     |                | Breast cancer   |                |
|-------------|-----------------|----------------|-----------------|----------------|
|             | OR (95%CI)      | <i>p</i> value | OR (95%CI)      | <i>p</i> value |
| rs10829130  | 0.99(0.93,1.05) | 0.797          | 0.99(0.96,1.03) | 0.621          |
| rs2021511   | 0.97(0.92,1.01) | 0.114          | 1.00(0.97,1.02) | 0.810          |
| rs138009430 | 0.92(0.23,3.73) | 0.910          | 0.38(0.12,1.19) | 0.096          |
| rs28998802  | 0.99(0.93,1.05) | 0.720          | 0.98(0.94,1.01) | 0.145          |
| rs12713428  | 0.97(0.92,1.01) | 0.151          | 1.01(0.98,1.04) | 0.387          |
| rs17728338  | 1.01(0.92,1.11) | 0.856          | 1.01(0.96,1.07) | 0.752          |
| rs12188300  | 1.00(0.93,1.07) | 0.975          | 1.03(0.99,1.07) | 0.198          |
| rs13210419  | 1.12(1.04,1.20) | 0.003          | 1.02(0.98,1.07) | 0.287          |
| rs9481169   | 0.97(0.90,1.04) | 0.395          | 1.01(0.97,1.05) | 0.615          |
| rs674451    | 0.99(0.95,1.03) | 0.680          | 0.98(0.95,1.00) | 0.079          |
| rs181316459 | 0.93(0.75,1.15) | 0.501          | 0.95(0.84,1.08) | 0.440          |
| rs60600003  | 0.99(0.93,1.06) | 0.800          | 0.98(0.94,1.01) | 0.224          |

rs4713605, rs1611309, rs28752856, rs4947309 wasn't detected in UKB data. All statistical tests are two-sided and unadjusted for multiple comparisons.

**Supplementary Table 13. The association of SNPs included as the instrument variables in two-sample Mendelian randomization analysis with the common risk factors related to breast and lung cancer.**

| SNP         | BMI             |                  | Smoking         |                | Oestradiol        |                | SHBG             |                  | Testosterone    |                |
|-------------|-----------------|------------------|-----------------|----------------|-------------------|----------------|------------------|------------------|-----------------|----------------|
|             | OR(95%CI)       | <i>p</i> value   | OR(95%CI)       | <i>p</i> value | OR(95%CI)         | <i>p</i> value | OR(95%CI)        | <i>p</i> value   | OR(95%CI)       | <i>p</i> value |
| rs10829130  | 1.00(0.97,1.03) | 0.765            | 0.99(0.97,1.02) | 0.567          | 1.25(0.20,7.89)   | 0.814          | 1.04(0.88,1.23)  | 0.629            | 1.00(0.98,1.02) | 0.901          |
| rs2021511   | 1.02(0.99,1.04) | 0.177            | 1.01(0.99,1.03) | 0.213          | 9.42(2.45,36.24)  | 0.001          | 1.07(0.95,1.20)  | 0.294            | 1.00(0.98,1.01) | 0.593          |
| rs138009430 | 1.01(0.53,1.91) | 0.982            | 1.11(0.71,1.73) | 0.639          | NA                | NA             | 1.46(0.05,46.54) | 0.831            | 0.87(0.55,1.36) | 0.529          |
| rs28998802  | 1.00(0.97,1.03) | 0.910            | 1.00(0.98,1.02) | 0.916          | 4.17(0.70,24.91)  | 0.117          | 1.02(0.87,1.19)  | 0.816            | 1.00(0.98,1.02) | 0.688          |
| rs12713428  | 0.99(0.96,1.01) | 0.212            | 0.99(0.98,1.01) | 0.538          | 3.34(0.79,14.11)  | 0.101          | 1.03(0.91,1.17)  | 0.612            | 1.00(0.98,1.01) | 0.703          |
| rs17728338  | 1.03(0.99,1.08) | 0.164            | 0.97(0.94,1.01) | 0.112          | 0.70(0.04,12.61)  | 0.810          | 0.80(0.62,1.03)  | 0.089            | 0.96(0.93,0.99) | 0.020          |
| rs12188300  | 0.95(0.91,0.98) | 0.001            | 0.99(0.97,1.02) | 0.629          | 2.50(0.32,19.76)  | 0.384          | 1.08(0.90,1.30)  | 0.383            | 1.01(0.99,1.04) | 0.317          |
| rs13210419  | 1.08(1.04,1.12) | <i>p</i> < 0.001 | 1.03(1.01,1.06) | 0.019          | 0.61(0.06,6.20)   | 0.672          | 0.63(0.51,0.77)  | <i>p</i> < 0.001 | 0.97(0.95,1.00) | 0.035          |
| rs9481169   | 0.99(0.95,1.02) | 0.538            | 1.00(0.97,1.02) | 0.725          | 0.95(0.11,8.37)   | 0.963          | 0.97(0.80,1.18)  | 0.769            | 0.97(0.95,1.00) | 0.027          |
| rs674451    | 1.00(0.98,1.02) | 0.779            | 1.01(1.00,1.03) | 0.116          | 0.79(0.22,2.87)   | 0.722          | 0.86(0.77,0.96)  | 0.009            | 0.99(0.98,1.01) | 0.340          |
| rs181316459 | 0.90(0.82,1.00) | 0.054            | 1.08(1.00,1.16) | 0.041          | 0.75(0.00,416.27) | 0.928          | 1.63(0.93,2.85)  | 0.085            | 1.08(1.00,1.16) | 0.042          |
| rs60600003  | 1.01(0.97,1.04) | 0.726            | 1.02(1.00,1.05) | 0.081          | 0.76(0.10,5.82)   | 0.795          | 1.06(0.88,1.26)  | 0.557            | 1.00(0.98,1.02) | 0.981          |

rs4713605, rs1611309, rs28752856, rs4947309 wasn't detected in UKB data. For Smoking, the reference is Never and the value is Current. All statistical tests are two-sided and unadjusted for multiple comparisons. Abbreviation: BMI, body mass index. SHBG, sex hormone-binding globulin.

**Supplementary Table 14. eQTL analysis revealing associations between psoriasis-related SNPs and corresponding protein-coding genes in lung tissues from GTEx.**

| SNP        | Gencode Id         | Gene Symbol | Variant Id             | <i>p</i> value | NES   | Tissue |
|------------|--------------------|-------------|------------------------|----------------|-------|--------|
| rs30376    | ENSG00000164307.12 | ERAP1       | chr5_96784555_C_T_b38  | 4.60E-37       | -0.53 | Lung   |
| rs3093661  | ENSG00000204516.9  | MICB        | chr6_31575981_G_A_b38  | 9.50E-21       | -0.83 | Lung   |
| rs33980500 | ENSG00000255389.1  | C6orf3      | chr6_111592059_C_T_b38 | 9.40E-42       | -0.83 | Lung   |
| rs4406273  | ENSG00000225851.1  | HLA-S       | chr6_31298313_G_A_b38  | 8.80E-21       | 0.91  | Lung   |
|            | ENSG00000204538.3  | PSORS1C2    | chr6_31298313_G_A_b38  | 5.20E-13       | 0.71  | Lung   |
|            | ENSG00000234745.10 | HLA-B       | chr6_31298313_G_A_b38  | 8.00E-11       | 0.27  | Lung   |
| rs28780087 | ENSG00000281831.1  | HCP5B       | chr6_30141996_G_A_b38  | 3.40E-17       | 0.90  | Lung   |
|            | ENSG00000204644.9  | ZFP57       | chr6_30141996_G_A_b38  | 1.20E-16       | 1.00  | Lung   |
| rs9399137  | ENSG00000118514.13 | ALDH8A1     | chr6_135097880_T_C_b38 | 1.60E-14       | -0.49 | Lung   |
| rs9267536  | ENSG00000250535.1  | STK19B      | chr6_31683417_A_C_b38  | 2.80E-17       | 1.10  | Lung   |
| rs1233391  | ENSG00000281831.1  | HCP5B       | chr6_29582841_T_C_b38  | 1.00E-10       | 0.42  | Lung   |
| rs28732201 | ENSG00000204516.9  | MICB        | chr6_32382677_G_A_b38  | 2.10E-10       | -0.55 | Lung   |
| rs9468830  | ENSG00000137312.14 | FLOT1       | chr6_30781935_T_G_b38  | 2.00E-15       | -0.16 | Lung   |
|            | ENSG00000228022.5  | HCG20       | chr6_30781935_T_G_b38  | 2.70E-13       | -0.42 | Lung   |
|            | ENSG00000204538.3  | PSORS1C2    | chr6_30781935_T_G_b38  | 7.70E-11       | 0.40  | Lung   |
| rs12215079 | ENSG00000250535.1  | STK19B      | chr6_32412901_C_A_b38  | 7.80E-18       | 1.40  | Lung   |
| rs17195173 | ENSG00000181126.13 | HLA-V       | chr6_30446311_G_A_b38  | 4.10E-12       | 0.85  | Lung   |
| rs2647089  | ENSG00000196735.11 | HLA-DQA1    | chr6_32713791_T_C_b38  | 3.50E-12       | -0.29 | Lung   |
|            | ENSG00000179344.16 | HLA-DQB1    | chr6_32713791_T_C_b38  | 1.60E-11       | -0.31 | Lung   |
|            | ENSG00000232629.8  | HLA-DQB2    | chr6_32713791_T_C_b38  | 1.40E-10       | 0.36  | Lung   |
| rs28780100 | ENSG00000206341.7  | HLA-H       | chr6_30406108_C_T_b38  | 4.60E-11       | 1.00  | Lung   |
| rs9525864  | ENSG00000151773.12 | CCDC122     | chr13_43883475_A_G_b38 | 2.50E-13       | -0.48 | Lung   |
| rs11648503 | ENSG00000184939.15 | ZFP90       | chr16_68565035_G_A_b38 | 5.30E-29       | 0.37  | Lung   |
| rs11652075 | ENSG00000141527.16 | CARD14      | chr17_80205094_C_T_b38 | 1.00E-12       | -0.28 | Lung   |
|            | ENSG00000181523.12 | SGSH        | chr17_80205094_C_T_b38 | 1.10E-10       | -0.18 | Lung   |

All statistical tests are two-sided and unadjusted for multiple comparisons. Abbreviation: SNP, single nucleotide polymorphisms. NES, normalized effect size.



**Supplementary Table 15. eQTL analysis revealing associations between psoriasis-related SNPs and corresponding protein-coding genes in breast tissues from GTEx.**

| SNP        | Gencode Id         | Gene Symbol | Variant Id             | <i>p</i> value | NES   | Tissue |
|------------|--------------------|-------------|------------------------|----------------|-------|--------|
| rs30376    | ENSG00000164307.12 | ERAP1       | chr5_96784555_C_T_b38  | 1.10E-20       | -0.34 | Breast |
| rs3093661  | ENSG00000204516.9  | MICB        | chr6_31575981_G_A_b38  | 4.40E-11       | -0.67 | Breast |
| rs33980500 | ENSG00000255389.1  | C6orf3      | chr6_111592059_C_T_b38 | 1.20E-33       | -1.00 | Breast |
| rs4406273  | ENSG00000204536.13 | CCHCR1      | chr6_31298313_G_A_b38  | 8.70E-13       | 0.36  | Breast |
|            | ENSG00000225851.1  | HLA-S       | chr6_31298313_G_A_b38  | 2.20E-11       | 0.73  | Breast |
|            | ENSG00000204538.3  | PSORS1C2    | chr6_31298313_G_A_b38  | 2.60E-11       | 0.65  | Breast |
| rs28780087 | ENSG00000281831.1  | HCP5B       | chr6_30141996_G_A_b38  | 1.50E-11       | 0.87  | Breast |
|            | ENSG00000204644.9  | ZFP57       | chr6_30141996_G_A_b38  | 1.70E-11       | 0.87  | Breast |
| rs9399137  | ENSG00000118514.13 | ALDH8A1     | chr6_135097880_T_C_b38 | 4.60E-14       | -0.50 | Breast |
|            | ENSG00000112339.14 | HBS1L       | chr6_135097880_T_C_b38 | 7.40E-11       | -0.25 | Breast |
| rs9267536  | ENSG00000250535.1  | STK19B      | chr6_31683417_A_C_b38  | 8.00E-15       | 1.10  | Breast |
| rs12215079 | ENSG00000250535.1  | STK19B      | chr6_32412901_C_A_b38  | 2.00E-15       | 1.30  | Breast |
| rs17195173 | ENSG00000181126.13 | HLA-V       | chr6_30446311_G_A_b38  | 1.80E-16       | 1.50  | Breast |
| rs2647089  | ENSG00000232629.8  | HLA-DQB2    | chr6_32713791_T_C_b38  | 2.80E-12       | 0.55  | Breast |
| rs9525864  | ENSG00000151773.12 | CCDC122     | chr13_43883475_A_G_b38 | 2.40E-14       | -0.66 | Breast |
| rs11652075 | ENSG00000181523.12 | SGSH        | chr17_80205094_C_T_b38 | 1.20E-10       | -0.17 | Breast |

All statistical tests are two-sided and unadjusted for multiple comparisons. Abbreviation: SNP, single nucleotide polymorphisms. NES, normalized effect size.

**Supplementary Table 16. The ICD codes for psoriasis, cancers and excluded diseases in UK Biobank.**

| <b>Phenotype</b>                                                                                     | <b>Codes</b> |
|------------------------------------------------------------------------------------------------------|--------------|
| <b>Psoriasis</b>                                                                                     | L40          |
| <b>Cancers</b>                                                                                       |              |
| Lip, oral cavity and pharynx                                                                         |              |
| Malignant neoplasm of lip                                                                            | C00          |
| Malignant neoplasm of base of tongue                                                                 | C01          |
| Malignant neoplasm of other and unspecified parts of tongue                                          | C02          |
| Malignant neoplasm of gum                                                                            | C03          |
| Malignant neoplasm of floor of mouth                                                                 | C04          |
| Malignant neoplasm of palate                                                                         | C05          |
| Malignant neoplasm of other and unspecified parts of mouth                                           | C06          |
| Malignant neoplasm of parotid gland                                                                  | C07          |
| Malignant neoplasm of other and unspecified major salivary glands                                    | C08          |
| Malignant neoplasm of tonsil                                                                         | C09          |
| Malignant neoplasm of oropharynx                                                                     | C10          |
| Malignant neoplasm of nasopharynx                                                                    | C11          |
| Malignant neoplasm of pyriform sinus                                                                 | C12          |
| Malignant neoplasm of hypopharynx                                                                    | C13          |
| Malignant neoplasm of other and ill-defined sites in the lip, oral cavity and pharynx                | C14          |
| Digestive organs                                                                                     |              |
| Malignant neoplasm of oesophagus                                                                     | C15          |
| Malignant neoplasm of stomach                                                                        | C16          |
| Malignant neoplasm of small intestine                                                                | C17          |
| Malignant neoplasm of colon                                                                          | C18          |
| Malignant neoplasm of rectosigmoid junction                                                          | C19          |
| Malignant neoplasm of rectum                                                                         | C20          |
| Malignant neoplasm of anus and anal canal                                                            | C21          |
| Malignant neoplasm of liver and intrahepatic bile ducts                                              | C22          |
| Malignant neoplasm of gallbladder                                                                    | C23          |
| Malignant neoplasm of other and unspecified parts of biliary tract                                   | C24          |
| Malignant neoplasm of pancreas                                                                       | C25          |
| Malignant neoplasm of other and ill-defined digestive organs                                         | C26          |
| Respiratory system and intrathoracic organs                                                          |              |
| Malignant neoplasm of nasal cavity and middle ear                                                    | C30          |
| Malignant neoplasm of accessory sinuses                                                              | C31          |
| Malignant neoplasm of larynx                                                                         | C32          |
| Malignant neoplasm of trachea                                                                        | C33          |
| Malignant neoplasm of bronchus and lung                                                              | C34          |
| Malignant neoplasm of thymus                                                                         | C37          |
| Malignant neoplasm of heart, mediastinum and pleura                                                  | C38          |
| Malignant neoplasm of other and ill-defined sites in the respiratory system and intrathoracic organs | C39          |
| Bone and articular cartilage                                                                         |              |
| Malignant neoplasm of bone and articular cartilage of limbs                                          | C40          |
| Malignant neoplasm of bone and articular cartilage of other and unspecified sites                    | C41          |
| Skin                                                                                                 |              |
| Malignant melanoma of skin                                                                           | C43          |
| Other malignant neoplasms of skin                                                                    | C44          |
| Mesothelial and soft tissue                                                                          |              |
| Mesothelioma                                                                                         | C45          |
| Kaposi's sarcoma                                                                                     | C46          |
| Malignant neoplasm of peripheral nerves and autonomic nervous system                                 | C47          |
| Malignant neoplasm of retroperitoneum and peritoneum                                                 | C48          |
| Malignant neoplasm of other connective and soft tissue                                               | C49          |
| Breast                                                                                               |              |
| Malignant neoplasm of breast                                                                         | C50          |
| Female genital organs                                                                                |              |
| Malignant neoplasm of vulva                                                                          | C51          |
| Malignant neoplasm of vagina                                                                         | C52          |
| Malignant neoplasm of cervix uteri                                                                   | C53          |
| Malignant neoplasm of corpus uteri                                                                   | C54          |
| Malignant neoplasm of uterus, part unspecified                                                       | C55          |
| Malignant neoplasm of ovary                                                                          | C56          |
| Malignant neoplasm of other and unspecified female genital organs                                    | C57          |

|                                                                                             |               |
|---------------------------------------------------------------------------------------------|---------------|
| Malignant neoplasm of placenta                                                              | C58           |
| Male genital organs                                                                         |               |
| Malignant neoplasm of penis                                                                 | C60           |
| Malignant neoplasm of prostate                                                              | C61           |
| Malignant neoplasm of testis                                                                | C62           |
| Malignant neoplasm of other and unspecified male genital organs                             | C63           |
| Urinary tract                                                                               |               |
| Malignant neoplasm of kidney, except renal pelvis                                           | C64           |
| Malignant neoplasm of renal pelvis                                                          | C65           |
| Malignant neoplasm of ureter                                                                | C66           |
| Malignant neoplasm of bladder                                                               | C67           |
| Malignant neoplasm of other and unspecified urinary organs                                  | C68           |
| Central nervous system                                                                      |               |
| Malignant neoplasm of eye and adnexa                                                        | C69           |
| Malignant neoplasm of meninges                                                              | C70           |
| Malignant neoplasm of brain                                                                 | C71           |
| Malignant neoplasm of spinal cord, cranial nerves and other parts of central nervous system | C72           |
| Endocrine glands                                                                            |               |
| Malignant neoplasm of thyroid gland                                                         | C73           |
| Malignant neoplasm of adrenal gland                                                         | C74           |
| Malignant neoplasm of other endocrine glands and related structures                         | C75           |
| Ill-defined, secondary and unspecified sites                                                |               |
| Malignant neoplasm of other and ill-defined sites                                           | C76           |
| Secondary and unspecified malignant neoplasm of lymph nodes                                 | C77           |
| Secondary malignant neoplasm of respiratory and digestive organs                            | C78           |
| Secondary malignant neoplasm of other sites                                                 | C79           |
| Malignant neoplasm without specification of site                                            | C80           |
| Lymphoid, haematopoietic and related tissue                                                 |               |
| Hodgkin's disease                                                                           | C81           |
| Follicular [nodular] non-Hodgkin's lymphoma                                                 | C82           |
| Diffuse non-Hodgkin's lymphoma                                                              | C83           |
| Peripheral and cutaneous T-cell lymphomas                                                   | C84           |
| Other and unspecified types of non-Hodgkin's lymphoma                                       | C85           |
| Other specified types of T/NK-cell lymphoma                                                 | C86           |
| Malignant immunoproliferative diseases                                                      | C88           |
| Multiple myeloma and malignant plasma cell neoplasms                                        | C90           |
| Lymphoid leukaemia                                                                          | C91           |
| Myeloid leukaemia                                                                           | C92           |
| Monocytic leukaemia                                                                         | C93           |
| Other leukaemias of specified cell type                                                     | C94           |
| Leukaemia of unspecified cell type                                                          | C95           |
| Other and unspecified malignant neoplasms of lymphoid, haematopoietic and related tissue    | C96           |
| Primary multiple sites                                                                      |               |
| Malignant neoplasms of primary multiple sites                                               | C97           |
| <b>Excluded autoimmune disease</b>                                                          |               |
| Multiple sclerosis                                                                          | G35           |
| Crohn's disease and ulcerative colitis                                                      | K50, K51      |
| Pemphigus, pemphigoid and lupus erythematosus                                               | L10, L12, L93 |
| Dermatopolymyositis                                                                         | M33           |
| Systemic lupus erythematosus                                                                | M32           |
| Rheumatoid arthritis                                                                        | M05, M06      |
| Necrotizing vasculopathies                                                                  | M30, M31      |
| Systemic sclerosis                                                                          | M34           |
| Other systemic connective tissue disorders                                                  | M35, M36      |

---

**Supplementary Table 17. Confounding factor definitions**

| <b>Cancer code</b>                                   | <b>Confounding factors</b>                                                                         | <b>Source and definition</b>                                                                                                                                                                                                     | <b>UK Biobank field code</b> |
|------------------------------------------------------|----------------------------------------------------------------------------------------------------|----------------------------------------------------------------------------------------------------------------------------------------------------------------------------------------------------------------------------------|------------------------------|
|                                                      | Age                                                                                                | UK Biobank baseline characteristics. Age of attending an initial assessment centre.                                                                                                                                              | 21022                        |
|                                                      | Sex                                                                                                | UK Biobank baseline characteristics. Sex based on self-reporting.                                                                                                                                                                | 31                           |
|                                                      | Race                                                                                               | Biobank Touchscreen questionnaire at baseline. Ethnic background asked during the initial assessment centre visit                                                                                                                | 21000                        |
|                                                      | BMI                                                                                                | UK Biobank baseline physical measures. BMI value is measured during the initial assessment centre visit.                                                                                                                         | 21001                        |
| C00-C26, C30-C39, C40-C41, C43-C44, C45-C58, C60-C97 | Smoking status                                                                                     | UK Biobank Touchscreen questionnaire at baseline. Smoking status was defined as current, previous, never smoker.                                                                                                                 | 20116                        |
|                                                      | Alcohol intake frequency                                                                           | UK Biobank Touchscreen questionnaire at baseline. Alcohol intake frequency was defined as daily or almost daily, three or four times a week, once or twice a week, one to three times a month, special occasions only and never. | 1558                         |
|                                                      | Physical activity                                                                                  | UK Biobank Touchscreen questionnaire at baseline. Physical activity was defined as specifically low intensity, moderate intensity, and high intensity.                                                                           | 22032                        |
|                                                      | Medication use (Glucocorticoids)<br>Medication use (Methotrexate)<br>Medication use (Cyclosporine) | UK Biobank Verbal interview at baseline. Medication use was defined as whether the corresponding medication is/was used or not.                                                                                                  | 20003                        |
| C43-C44                                              | Sun exposure                                                                                       | UK Biobank Touchscreen questionnaire at baseline. Sun exposure was defined as the total hours spend outdoors in a typical day in summer and in winter.                                                                           | 1050, 1060                   |
|                                                      | Age at menarche                                                                                    | UK Biobank Touchscreen questionnaire at baseline. Age when periods started.                                                                                                                                                      | 2714                         |
| C50-C58                                              | Number of live births                                                                              | UK Biobank Touchscreen questionnaire at baseline.                                                                                                                                                                                | 2734                         |
|                                                      | Menopausal status                                                                                  | UK Biobank Touchscreen questionnaire at baseline. Menopausal status was defined as yes, and other response.                                                                                                                      | 2724                         |
|                                                      | Red meat intake levels                                                                             | UK Biobank Touchscreen questionnaire at baseline. Red meat intake levels were defined as the median data of beef, lamb/mutton and pork intake.                                                                                   | 1369, 1379, 1389             |
| C18-C20                                              | Fiber intake levels                                                                                | UK Biobank Touchscreen questionnaire at baseline. Fiber intake levels were defined as the median data of cooked vegetable and salad/raw vegetable intake.                                                                        | 1289, 1299                   |

BMI, body mass index.

**Supplementary Table 18. Characteristics of the 74 SNPs included as the instrument variables in the PheWAS of psoriasis PRS and one-sample Mendelian Randomization analysis.**

| SNP         | EA | OA | BETA  | SE   | MAF  | p value   |
|-------------|----|----|-------|------|------|-----------|
| rs12135210  | T  | G  | -1.09 | 0.19 | 0.02 | 8.03E-09  |
| rs4845454   | T  | C  | 0.27  | 0.03 | 0.35 | 1.98E-15  |
| rs61774731  | A  | G  | -2.63 | 0.29 | 0.09 | 6.35E-20  |
| rs77520588  | A  | G  | -1.63 | 0.21 | 0.03 | 5.94E-15  |
| rs78636848  | A  | C  | -1.65 | 0.24 | 0.02 | 1.58E-11  |
| rs80174646  | T  | G  | -0.45 | 0.08 | 0.07 | 4.55E-09  |
| rs13394291  | C  | T  | -1.75 | 0.21 | 0.04 | 2.98E-16  |
| rs1990760   | T  | C  | 0.19  | 0.03 | 0.41 | 1.95E-08  |
| rs268877    | G  | A  | 2.35  | 0.40 | 0.02 | 3.06E-09  |
| rs6714339   | T  | C  | -0.37 | 0.06 | 0.13 | 2.07E-10  |
| rs6755395   | G  | A  | -1.80 | 0.30 | 0.03 | 1.09E-09  |
| rs74864202  | A  | C  | -3.61 | 0.46 | 0.02 | 4.98E-15  |
| rs78580783  | C  | A  | -1.36 | 0.21 | 0.02 | 8.24E-11  |
| rs116054851 | C  | A  | -3.77 | 0.43 | 0.02 | 3.08E-18  |
| rs3135952   | T  | C  | -1.93 | 0.23 | 0.03 | 2.46E-17  |
| rs6833586   | G  | A  | -4.16 | 0.56 | 0.02 | 7.42E-14  |
| rs72669160  | C  | T  | -0.45 | 0.07 | 0.12 | 8.66E-12  |
| rs114071237 | T  | G  | -1.33 | 0.20 | 0.02 | 3.39E-11  |
| rs114835245 | G  | A  | -0.99 | 0.15 | 0.03 | 2.19E-11  |
| rs141417497 | A  | G  | -3.49 | 0.50 | 0.03 | 4.42E-12  |
| rs17728338  | A  | G  | 0.45  | 0.06 | 0.05 | 7.42E-15  |
| rs30376     | T  | C  | -0.21 | 0.03 | 0.28 | 5.11E-10  |
| rs4921224   | T  | C  | -0.23 | 0.03 | 0.33 | 3.59E-12  |
| rs10947129  | A  | G  | 0.20  | 0.03 | 0.15 | 1.01E-09  |
| rs113866081 | A  | G  | -1.73 | 0.23 | 0.03 | 3.63E-14  |
| rs12215079  | A  | C  | 0.91  | 0.07 | 0.02 | 5.61E-44  |
| rs1233391   | C  | T  | 0.37  | 0.04 | 0.20 | 3.57E-23  |
| rs13210132  | G  | A  | 1.26  | 0.05 | 0.06 | 7.36E-143 |
| rs17066690  | C  | A  | -2.69 | 0.35 | 0.02 | 1.89E-14  |
| rs17195173  | A  | G  | 0.87  | 0.09 | 0.01 | 1.08E-23  |
| rs2647089   | C  | T  | 0.41  | 0.03 | 0.26 | 1.32E-40  |
| rs28732201  | A  | G  | 1.10  | 0.06 | 0.04 | 7.90E-70  |
| rs28780087  | A  | G  | 0.78  | 0.05 | 0.07 | 4.69E-48  |
| rs28780100  | T  | C  | 1.12  | 0.06 | 0.04 | 2.64E-68  |
| rs3093661   | A  | G  | 1.29  | 0.06 | 0.04 | 5.65E-105 |
| rs33980500  | T  | C  | 0.43  | 0.05 | 0.08 | 3.64E-19  |
| rs34241101  | T  | G  | 1.08  | 0.05 | 0.07 | 2.72E-125 |
| rs4406273   | A  | G  | 1.44  | 0.04 | 0.09 | 1.00E-200 |
| rs62421044  | A  | G  | -0.28 | 0.05 | 0.14 | 1.70E-08  |
| rs635688    | C  | T  | -0.24 | 0.03 | 0.41 | 7.43E-13  |
| rs67543742  | G  | A  | 0.21  | 0.04 | 0.22 | 9.82E-09  |
| rs68191     | C  | T  | 0.29  | 0.05 | 0.10 | 2.76E-10  |
| rs77464075  | T  | C  | -1.79 | 0.30 | 0.02 | 2.47E-09  |
| rs9267536   | C  | A  | 0.65  | 0.06 | 0.04 | 5.50E-30  |
| rs9399137   | C  | T  | -0.25 | 0.04 | 0.25 | 8.92E-10  |
| rs9461362   | T  | C  | 0.24  | 0.04 | 0.14 | 9.12E-11  |
| rs9468487   | G  | A  | 0.35  | 0.05 | 0.06 | 5.52E-11  |
| rs9468830   | G  | T  | 0.49  | 0.03 | 0.29 | 1.33E-54  |
| rs146281313 | C  | A  | -4.61 | 0.40 | 0.04 | 1.28E-30  |
| rs2329570   | C  | T  | -4.30 | 0.58 | 0.05 | 9.82E-14  |
| rs73695700  | A  | G  | 0.89  | 0.11 | 0.02 | 3.36E-15  |
| rs77840275  | C  | T  | -0.44 | 0.07 | 0.08 | 3.03E-10  |
| rs73246593  | T  | C  | -0.63 | 0.10 | 0.06 | 1.06E-09  |
| rs73277117  | C  | A  | -3.65 | 0.49 | 0.02 | 1.22E-13  |
| rs76930577  | C  | T  | -3.65 | 0.38 | 0.03 | 8.25E-22  |
| rs117505735 | A  | C  | -2.13 | 0.38 | 0.01 | 3.30E-08  |
| rs117950837 | C  | A  | -1.17 | 0.21 | 0.02 | 3.67E-08  |
| rs7865117   | T  | G  | -2.73 | 0.42 | 0.03 | 9.03E-11  |
| rs117135073 | T  | C  | -2.42 | 0.35 | 0.02 | 2.20E-12  |
| rs116976310 | C  | A  | -1.50 | 0.26 | 0.02 | 4.45E-09  |

|             |   |   |       |      |      |          |
|-------------|---|---|-------|------|------|----------|
| rs2277268   | A | G | -0.47 | 0.08 | 0.07 | 2.54E-08 |
| rs57939339  | A | G | -1.49 | 0.22 | 0.02 | 2.52E-11 |
| rs75430970  | C | T | -0.28 | 0.05 | 0.16 | 1.81E-09 |
| rs4768259   | A | C | -1.88 | 0.28 | 0.02 | 1.19E-11 |
| rs9525864   | G | A | -0.55 | 0.06 | 0.08 | 1.51E-18 |
| rs11648503  | A | G | 0.26  | 0.04 | 0.23 | 7.58E-10 |
| rs12447534  | T | C | -0.18 | 0.03 | 0.40 | 2.47E-08 |
| rs34413922  | T | C | -1.91 | 0.22 | 0.03 | 1.06E-18 |
| rs11652075  | T | C | -0.17 | 0.03 | 0.50 | 2.23E-08 |
| rs117094752 | C | T | -0.79 | 0.12 | 0.03 | 1.20E-10 |
| rs184983166 | A | C | -1.86 | 0.32 | 0.02 | 8.67E-09 |
| rs57009492  | T | C | -0.39 | 0.06 | 0.10 | 1.55E-09 |
| rs892085    | A | G | 0.18  | 0.03 | 0.44 | 4.18E-10 |
| rs6031647   | G | A | 0.39  | 0.06 | 0.07 | 5.11E-10 |

All statistical tests are two-sided and unadjusted for multiple comparisons. Abbreviation: SNP, single nucleotide polymorphism. EA, Effect Allele. OA, Other Allele. MAF, minor allele frequencies. SE, standard error

**Supplementary Table 19. Annotation of psoriasis-associated 74 SNPs.**

| SNP         | Gene names             | Gene type      | Gene Function                                                                                |
|-------------|------------------------|----------------|----------------------------------------------------------------------------------------------|
| rs4845454   | LCE3A, LCE3B           | Protein coding | Innate cutaneous host defense                                                                |
| rs80174646  | IL23R                  | Protein coding | Interleukin-23 receptor subunit                                                              |
| rs1990760   | IFIH1                  | Protein coding | Intracellular sensor of viral RNA                                                            |
| rs30376     | ERAP1                  | Protein coding | Trimming HLA class I-binding precursors                                                      |
| rs3093661   | TNF,LTA                | Protein coding | Cytokine                                                                                     |
| rs33980500  | TRAF3IP2, TRAF3IP2-AS1 | Protein coding | E3 ubiquitin ligase                                                                          |
| rs77464075  | BACH2                  | Protein coding | Maintenance of regulatory T-cell function and B-cell maturation                              |
| rs9525864   | LACC1                  | Protein coding | Encoding an multifunctional purine enzyme                                                    |
| rs11652075  | CARD14, SGSH           | Protein coding | Upstream activators of BCL10 and NF-kappaB signaling.                                        |
| rs77840275  | ELMO1                  | Protein coding | A member of the engulfment and cell motility protein family                                  |
| rs28780087  | TRIM40                 | Protein coding | E3 ubiquitin ligase                                                                          |
| rs635688    | BRD2                   | Protein coding | Transcriptional regulator                                                                    |
| rs61774731  | RUNX3                  | Protein coding | Recognizing the core consensus binding sequence                                              |
| rs75430970  | EMSY                   | Protein coding | Transcription Regulator                                                                      |
| rs11648503  | ZFP90                  | Protein coding | NRSF silencer factor                                                                         |
| rs34413922  | SGF29                  | Protein coding | Chromatin reader component                                                                   |
| rs6031647   | PKIG                   | Protein coding | A competitive cAMP-dependent protein kinase inhibitor (Predicted)                            |
| rs57009492  | CDK12                  | Protein coding | Cyclin-dependent kinase                                                                      |
| rs34241101  | SKIC2,STK19,DXO        | Protein coding | Helicase component of the SKI complex; Regulator of NRAS signaling                           |
| rs9399137   | HBS1L                  | Protein coding | GTPase component of the Pelota-HBS1L complex                                                 |
| rs73695700  | FIGNL1,DDC             | Protein coding | DNA double-strand break repair; Dopamine biosynthesis                                        |
| rs9267536   | LY6G5C,ABHD16A         | Protein coding | GPI-anchored cell surface proteins; Prostaglandin catabolic process                          |
| rs2277268   | LRP5                   | Protein coding | A coreceptor with members of the frizzled family                                             |
| rs6714339   | USP34                  | Protein coding | Regulator of Wnt signaling pathway                                                           |
| rs116054851 | DOCK3                  | Protein coding | Guanine nucleotide exchange factor                                                           |
| rs1233391   | GABBR1, RPL13AP        | Protein coding | Component of a heterodimeric G-protein coupled receptor for GABA                             |
| rs3135952   | SHISA5,TREX1           | Protein coding | Together with p53 induces apoptosis; DNA repair and proofreading for DNA polymerase          |
| rs268877    | ACTR2                  | Protein coding | Major constituent of the ARP2/3 complex                                                      |
| rs78636848  | DENND1B                | Protein coding | Guanine nucleotide exchange factor                                                           |
| rs57939339  | RNH1                   | Protein coding | Ribonuclease inhibitor                                                                       |
| rs892085    | QTRT1                  | Protein coding | Encoding the catalytic subunit of tRNA-guanine transglycosylase                              |
| rs4768259   | MUC19                  | Protein coding | Function in ocular mucus homeostasis (Predicted)                                             |
| rs13210132  | MUC22                  | Protein coding | Component of membrane (Predicted)                                                            |
| rs116976310 | IFT46                  | Protein coding | Part of a complex involved in intraflagellar transport                                       |
| rs114835245 | TTC33                  | Protein coding | Unknown                                                                                      |
| rs117135073 | ZNF365                 | Protein coding | Uric acid excretion (Predicted)                                                              |
| rs117094752 | NOS2                   | Protein coding | Produces nitric oxide                                                                        |
| rs184983166 | CCL11                  | Protein coding | Eotaxin                                                                                      |
| rs17728338  | ANXA6                  | Protein coding | Associate with CD21 (Predicted)                                                              |
| rs4406273   | LINC02571              | Non-coding     | Influence the expression levels of HLA-C class I molecules in immune and resident skin cells |
| rs4921224   | ENSG00000249738        | Non-coding     |                                                                                              |
| rs17066690  | LINC03004              | Non-coding     |                                                                                              |
| rs28732201  | TSBP1-AS1              | Non-coding     |                                                                                              |
| rs9468487   | ENSG00000290479        | Non-coding     |                                                                                              |
| rs9468830   | HCG20                  | Non-coding     |                                                                                              |
| rs2329570   | ENSG00000228204        | Non-coding     |                                                                                              |
| rs7865117   | ENSG00000287368        | Non-coding     |                                                                                              |
| rs73277117  | ENSG00000253553        | Non-coding     | Antisense to MMP16                                                                           |
| rs76930577  | ENSG00000286675        | Non-coding     |                                                                                              |
| rs12135210  | Unknown                |                |                                                                                              |
| rs77520588  | Unknown                |                |                                                                                              |
| rs13394291  | Unknown                |                |                                                                                              |
| rs6755395   | Unknown                |                |                                                                                              |
| rs74864202  | Unknown                |                |                                                                                              |
| rs78580783  | Unknown                |                |                                                                                              |
| rs6833586   | Unknown                |                |                                                                                              |
| rs72669160  | Unknown                |                |                                                                                              |
| rs114071237 | Unknown                |                |                                                                                              |
| rs141417497 | Unknown                |                |                                                                                              |
| rs12447534  | Unknown                |                |                                                                                              |

|             |         |
|-------------|---------|
| rs10947129  | Unknown |
| rs113866081 | Unknown |
| rs12215079  | Unknown |
| rs17195173  | Unknown |
| rs2647089   | Unknown |
| rs28780100  | Unknown |
| rs62421044  | Unknown |
| rs67543742  | Unknown |
| rs68191     | Unknown |
| rs9461362   | Unknown |
| rs146281313 | Unknown |
| rs73246593  | Unknown |
| rs117505735 | Unknown |
| rs117950837 | Unknown |

---

Abbreviation: SNP, single nucleotide polymorphism. BCL10, B-cell lymphoma 10. NRAS, GTPase NRas. GPI, glycosylphosphatidylinositol. GABA, gamma-aminobutyric acid. ARP, actin-related proteins.



**Supplementary table 20. Characteristics of the 11 SNPs included as the instrument variables in two-sample Mendelian randomization analysis (Anal canal cancer).**

| <b>SNP</b> | <b>EA</b> | <b>OA</b> | <b>EAF</b> | <b>Beta</b> | <b>SE</b> | <b><i>p</i> value</b> |
|------------|-----------|-----------|------------|-------------|-----------|-----------------------|
| rs10829130 | A         | G         | 0.11       | 0.20        | 0.04      | 4.24E-08              |
| rs12188300 | T         | A         | 0.06       | 0.43        | 0.05      | 2.24E-18              |
| rs12713428 | C         | A         | 0.25       | 0.17        | 0.03      | 8.11E-11              |
| rs13210419 | A         | G         | 0.06       | 1.12        | 0.05      | 1.10E-105             |
| rs17728338 | A         | G         | 0.07       | 0.31        | 0.04      | 1.76E-12              |
| rs2021511  | T         | C         | 0.27       | -0.14       | 0.03      | 4.75E-08              |
| rs28998802 | A         | G         | 0.19       | 0.17        | 0.03      | 7.41E-09              |
| rs4713605  | A         | T         | 0.33       | 0.15        | 0.02      | 2.35E-10              |
| rs60600003 | G         | T         | 0.10       | 0.21        | 0.04      | 1.03E-08              |
| rs674451   | C         | T         | 0.34       | 0.13        | 0.02      | 2.82E-08              |
| rs9481169  | T         | G         | 0.08       | 0.25        | 0.04      | 2.47E-09              |

All statistical tests are two-sided and unadjusted for multiple comparisons. Abbreviation: SNP, single nucleotide polymorphism. EA, Effect Allele. OA, Other Allele. EAF, effect allele frequencies. SE, standard error.

**Supplementary table 21. Characteristics of the 9 SNPs included as the instrument variables in two-sample Mendelian randomization analysis (Lung cancer).**

| <b>SNP</b> | <b>EA</b> | <b>OA</b> | <b>EAF</b> | <b>Beta</b> | <b>SE</b> | <b><i>p</i> value</b> |
|------------|-----------|-----------|------------|-------------|-----------|-----------------------|
| rs10829130 | A         | G         | 0.11       | 0.20        | 0.04      | 4.24E-08              |
| rs12713428 | C         | A         | 0.25       | 0.17        | 0.03      | 8.11E-11              |
| rs13210419 | A         | G         | 0.06       | 1.12        | 0.05      | 1.10E-105             |
| rs17728338 | A         | G         | 0.07       | 0.31        | 0.04      | 1.76E-12              |
| rs2021511  | T         | C         | 0.27       | -0.14       | 0.03      | 4.75E-08              |
| rs28998802 | A         | G         | 0.19       | 0.17        | 0.03      | 7.41E-09              |
| rs60600003 | G         | T         | 0.10       | 0.21        | 0.04      | 1.03E-08              |
| rs674451   | C         | T         | 0.34       | 0.13        | 0.02      | 2.82E-08              |
| rs9481169  | T         | G         | 0.08       | 0.25        | 0.04      | 2.47E-09              |

All statistical tests are two-sided and unadjusted for multiple comparisons. Abbreviation: SNP, single nucleotide polymorphism. EA, Effect Allele. OA, Other Allele. EAF, effect allele frequencies. SE, standard error.

**Supplementary table 22. Characteristics of the 12 SNPs included as the instrument variables in two-sample Mendelian randomization analysis (Nonmelanoma skin cancer).**

| SNP        | EA | OA | EAF  | Beta  | SE   | <i>p</i> value |
|------------|----|----|------|-------|------|----------------|
| rs10829130 | A  | G  | 0.11 | 0.20  | 0.04 | 4.24E-08       |
| rs12188300 | T  | A  | 0.06 | 0.43  | 0.05 | 2.24E-18       |
| rs12713428 | C  | A  | 0.25 | 0.17  | 0.03 | 8.11E-11       |
| rs13210419 | A  | G  | 0.06 | 1.12  | 0.05 | 1.10E-105      |
| rs1611309  | T  | C  | 0.63 | 0.24  | 0.03 | 1.60E-19       |
| rs17728338 | A  | G  | 0.07 | 0.31  | 0.04 | 1.76E-12       |
| rs2021511  | T  | C  | 0.27 | -0.14 | 0.03 | 4.75E-08       |
| rs28998802 | A  | G  | 0.19 | 0.17  | 0.03 | 7.41E-09       |
| rs4713605  | A  | T  | 0.33 | 0.15  | 0.02 | 2.35E-10       |
| rs60600003 | G  | T  | 0.10 | 0.21  | 0.04 | 1.03E-08       |
| rs674451   | C  | T  | 0.34 | 0.13  | 0.02 | 2.82E-08       |
| rs9481169  | T  | G  | 0.08 | 0.25  | 0.04 | 2.47E-09       |

All statistical tests are two-sided and unadjusted for multiple comparisons. Abbreviation: SNP, single nucleotide polymorphism. EA, Effect Allele. OA, Other Allele. EAF, effect allele frequencies. SE, standard error.

**Supplementary table 23. Characteristics of the 16 SNPs included as the instrument variables in two-sample Mendelian randomization analysis (Breast cancer).**

| <b>SNP</b>  | <b>EA</b> | <b>OA</b> | <b>EAF</b> | <b>Beta</b> | <b>SE</b> | <b>p value</b> |
|-------------|-----------|-----------|------------|-------------|-----------|----------------|
| rs10829130  | A         | G         | 0.11       | 0.20        | 0.04      | 4.24E-08       |
| rs12188300  | T         | A         | 0.06       | 0.43        | 0.05      | 2.24E-18       |
| rs12713428  | C         | A         | 0.25       | 0.17        | 0.03      | 8.11E-11       |
| rs13210419  | A         | G         | 0.06       | 1.12        | 0.05      | 1.10E-105      |
| rs138009430 | A         | C         | 0.08       | 0.25        | 0.04      | 1.94E-09       |
| rs1611309   | T         | C         | 0.63       | 0.24        | 0.03      | 1.60E-19       |
| rs17728338  | A         | G         | 0.07       | 0.31        | 0.04      | 1.76E-12       |
| rs181316459 | C         | G         | 0.05       | 0.35        | 0.06      | 1.50E-10       |
| rs2021511   | T         | C         | 0.27       | -0.14       | 0.03      | 4.75E-08       |
| rs28752856  | G         | C         | 0.11       | 0.83        | 0.04      | 5.90E-100      |
| rs28998802  | A         | G         | 0.19       | 0.17        | 0.03      | 7.41E-09       |
| rs4713605   | A         | T         | 0.33       | 0.15        | 0.02      | 2.35E-10       |
| rs4947309   | T         | A         | 0.23       | 0.55        | 0.03      | 3.86E-90       |
| rs60600003  | G         | T         | 0.10       | 0.21        | 0.04      | 1.03E-08       |
| rs674451    | C         | T         | 0.34       | 0.13        | 0.02      | 2.82E-08       |
| rs9481169   | T         | G         | 0.08       | 0.25        | 0.04      | 2.47E-09       |

All statistical tests are two-sided and unadjusted for multiple comparisons. Abbreviation: SNP, single nucleotide polymorphism. EA, Effect Allele. OA, Other Allele. EAF, effect allele frequencies. SE, standard error.

**Supplementary table 24. Characteristics of the 9 SNPs included as the instrument variables in two-sample Mendelian randomization analysis (Kidney cancer).**

| <b>SNP</b> | <b>EA</b> | <b>OA</b> | <b>EAF</b> | <b>Beta</b> | <b>SE</b> | <b>p value</b> |
|------------|-----------|-----------|------------|-------------|-----------|----------------|
| rs10829130 | A         | G         | 0.11       | 0.20        | 0.04      | 4.24E-08       |
| rs12713428 | C         | A         | 0.25       | 0.17        | 0.03      | 8.11E-11       |
| rs13210419 | A         | G         | 0.06       | 1.12        | 0.05      | 1.10E-105      |
| rs17728338 | A         | G         | 0.07       | 0.31        | 0.04      | 1.76E-12       |
| rs2021511  | T         | C         | 0.27       | -0.14       | 0.03      | 4.75E-08       |
| rs28998802 | A         | G         | 0.19       | 0.17        | 0.03      | 7.41E-09       |
| rs60600003 | G         | T         | 0.10       | 0.21        | 0.04      | 1.03E-08       |
| rs674451   | C         | T         | 0.34       | 0.13        | 0.02      | 2.82E-08       |
| rs9481169  | T         | G         | 0.08       | 0.25        | 0.04      | 2.47E-09       |

All statistical tests are two-sided and unadjusted for multiple comparisons. Abbreviation: SNP, single nucleotide polymorphism. EA, Effect Allele. OA, Other Allele. EAF, effect allele frequencies. SE, standard error.

**Supplementary table 25. Characteristics of the 12 SNPs included as the instrument variables in two-sample Mendelian randomization analysis (Secondary malignant neoplasm of respiratory and digestive organs)**

| SNP        | EA | OA | EAF  | Beta  | SE   | <i>p</i> value |
|------------|----|----|------|-------|------|----------------|
| rs10829130 | A  | G  | 0.11 | 0.20  | 0.04 | 4.24E-08       |
| rs12188300 | T  | A  | 0.06 | 0.43  | 0.05 | 2.24E-18       |
| rs12713428 | C  | A  | 0.25 | 0.17  | 0.03 | 8.11E-11       |
| rs13210419 | A  | G  | 0.06 | 1.12  | 0.05 | 1.10E-105      |
| rs1611309  | T  | C  | 0.63 | 0.24  | 0.03 | 1.60E-19       |
| rs17728338 | A  | G  | 0.07 | 0.31  | 0.04 | 1.76E-12       |
| rs2021511  | T  | C  | 0.27 | -0.14 | 0.03 | 4.75E-08       |
| rs28998802 | A  | G  | 0.19 | 0.17  | 0.03 | 7.41E-09       |
| rs4713605  | A  | T  | 0.33 | 0.15  | 0.02 | 2.35E-10       |
| rs60600003 | G  | T  | 0.10 | 0.21  | 0.04 | 1.03E-08       |
| rs674451   | C  | T  | 0.34 | 0.13  | 0.02 | 2.82E-08       |
| rs9481169  | T  | G  | 0.08 | 0.25  | 0.04 | 2.47E-09       |

All statistical tests are two-sided and unadjusted for multiple comparisons. Abbreviation: SNP, single nucleotide polymorphism. EA, Effect Allele. OA, Other Allele. EAF, effect allele frequencies. SE, standard error.

**Supplementary table 26. Characteristics of the 12 SNPs included as the instrument variables in two-sample Mendelian randomization analysis (Secondary malignant neoplasm of other sites)**

| SNP        | EA | OA | EAF  | Beta  | SE   | <i>p</i> value |
|------------|----|----|------|-------|------|----------------|
| rs10829130 | A  | G  | 0.11 | 0.20  | 0.04 | 4.24E-08       |
| rs12188300 | T  | A  | 0.06 | 0.43  | 0.05 | 2.24E-18       |
| rs12713428 | C  | A  | 0.25 | 0.17  | 0.03 | 8.11E-11       |
| rs13210419 | A  | G  | 0.06 | 1.12  | 0.05 | 1.10E-105      |
| rs1611309  | T  | C  | 0.63 | 0.24  | 0.03 | 1.60E-19       |
| rs17728338 | A  | G  | 0.07 | 0.31  | 0.04 | 1.76E-12       |
| rs2021511  | T  | C  | 0.27 | -0.14 | 0.03 | 4.75E-08       |
| rs28998802 | A  | G  | 0.19 | 0.17  | 0.03 | 7.41E-09       |
| rs4713605  | A  | T  | 0.33 | 0.15  | 0.02 | 2.35E-10       |
| rs60600003 | G  | T  | 0.10 | 0.21  | 0.04 | 1.03E-08       |
| rs674451   | C  | T  | 0.34 | 0.13  | 0.02 | 2.82E-08       |
| rs9481169  | T  | G  | 0.08 | 0.25  | 0.04 | 2.47E-09       |

All statistical tests are two-sided and unadjusted for multiple comparisons. Abbreviation: SNP, single nucleotide polymorphism. EA, Effect Allele. OA, Other Allele. EAF, effect allele frequencies. SE, standard error.

**Supplementary table 27. Characteristics of the 11 SNPs included as the instrument variables in two-sample Mendelian randomization analysis (Follicular [nodular] non-Hodgkin's lymphoma)**

| <b>SNP</b> | <b>EA</b> | <b>OA</b> | <b>EAF</b> | <b>Beta</b> | <b>SE</b> | <b>p value</b> |
|------------|-----------|-----------|------------|-------------|-----------|----------------|
| rs10829130 | A         | G         | 0.11       | 0.20        | 0.04      | 4.24E-08       |
| rs12188300 | T         | A         | 0.06       | 0.43        | 0.05      | 2.24E-18       |
| rs12713428 | C         | A         | 0.25       | 0.17        | 0.03      | 8.11E-11       |
| rs13210419 | A         | G         | 0.06       | 1.12        | 0.05      | 1.10E-105      |
| rs17728338 | A         | G         | 0.07       | 0.31        | 0.04      | 1.76E-12       |
| rs2021511  | T         | C         | 0.27       | -0.14       | 0.03      | 4.75E-08       |
| rs28998802 | A         | G         | 0.19       | 0.17        | 0.03      | 7.41E-09       |
| rs4713605  | A         | T         | 0.33       | 0.15        | 0.02      | 2.35E-10       |
| rs60600003 | G         | T         | 0.10       | 0.21        | 0.04      | 1.03E-08       |
| rs674451   | C         | T         | 0.34       | 0.13        | 0.02      | 2.82E-08       |
| rs9481169  | T         | G         | 0.08       | 0.25        | 0.04      | 2.47E-09       |

All statistical tests are two-sided and unadjusted for multiple comparisons. Abbreviation: SNP, single nucleotide polymorphism. EA, Effect Allele. OA, Other Allele. EAF, effect allele frequencies. SE, standard error.



**Supplementary Table 28. Welch's t-test comparison of gene expression in lung tissues from GTEx and non-small cell lung cancer tissues from TCGA.**  
 All statistical tests are two-sided.

| <b>Gene Symbol</b> | <b>Welch's t-test</b> | <b>p value</b> |
|--------------------|-----------------------|----------------|
| ERAP1              | -7.54                 | 2.22E-13       |
| MICB               | -6.89                 | 1.30E-11       |
| C6orf3             | -39.65                | 4.04E-161      |
| PSORS1C2           | -2.62                 | 8.89E-03       |
| HLA-B              | -6.18                 | 1.35E-09       |
| HCP5B              | -15.02                | 1.92E-41       |
| ZFP57              | -2.47                 | 1.38E-02       |
| ALDH8A1            | -21.96                | 6.34E-88       |
| STK19B             | -0.50                 | 6.19E-01       |
| FLOT1              | -1.08                 | 2.79E-01       |
| HCG20              | -1.51                 | 1.31E-01       |
| HLA-V              | -31.83                | 3.04E-149      |
| HLA-DQA1           | 1.39                  | 1.64E-01       |
| HLA-DQB1           | -1.83                 | 6.81E-02       |
| HLA-DQB2           | -8.46                 | 1.68E-16       |
| HLA-H              | -13.82                | 7.82E-37       |
| CCDC122            | -4.15                 | 3.82E-05       |
| ZFP90              | -1.08                 | 2.83E-01       |
| CARD14             | -20.39                | 1.73E-76       |
| SGSH               | -18.65                | 8.95E-57       |

**Supplementary Table 29. Welch's t-test comparison of gene expression in breast tissues from GTEx and breast cancer tissues from TCGA.**  
All statistical tests are two-sided.

| <b>Gene Symbol</b> | <b>Welch's t-test</b> | <b><i>p</i> value</b> |
|--------------------|-----------------------|-----------------------|
| ERAP1              | -8.140                | 4.67E-15              |
| MICB               | -13.50                | 3.14E-34              |
| C6orf3             | -34.67                | 6.23E-106             |
| CCHCR1             | -0.02                 | 9.85E-01              |
| PSORS1C2           | -3.09                 | 2.15E-03              |
| HCP5B              | -15.67                | 8.19E-38              |
| ZFP57              | -1.93                 | 5.44E-02              |
| ALDH8A1            | -16.12                | 3.47E-43              |
| HBS1L              | -36.95                | 2.49E-178             |
| STK19B             | -6.12                 | 3.21E-9               |
| HLA-V              | -2.16                 | 3.20E-02              |
| HLA-DQB2           | -15.09                | 1.34E-36              |
| CCDC122            | -3.88                 | 1.32E-04              |
| SGSH               | -19.40                | 1.80E-53              |

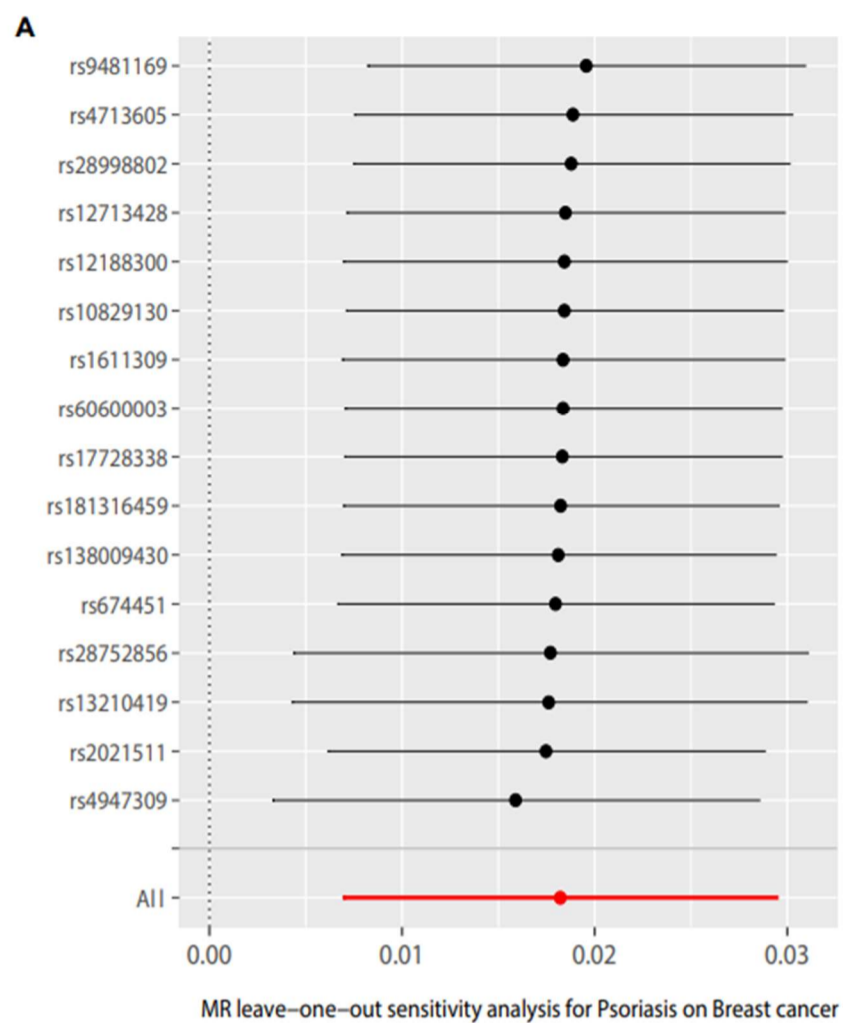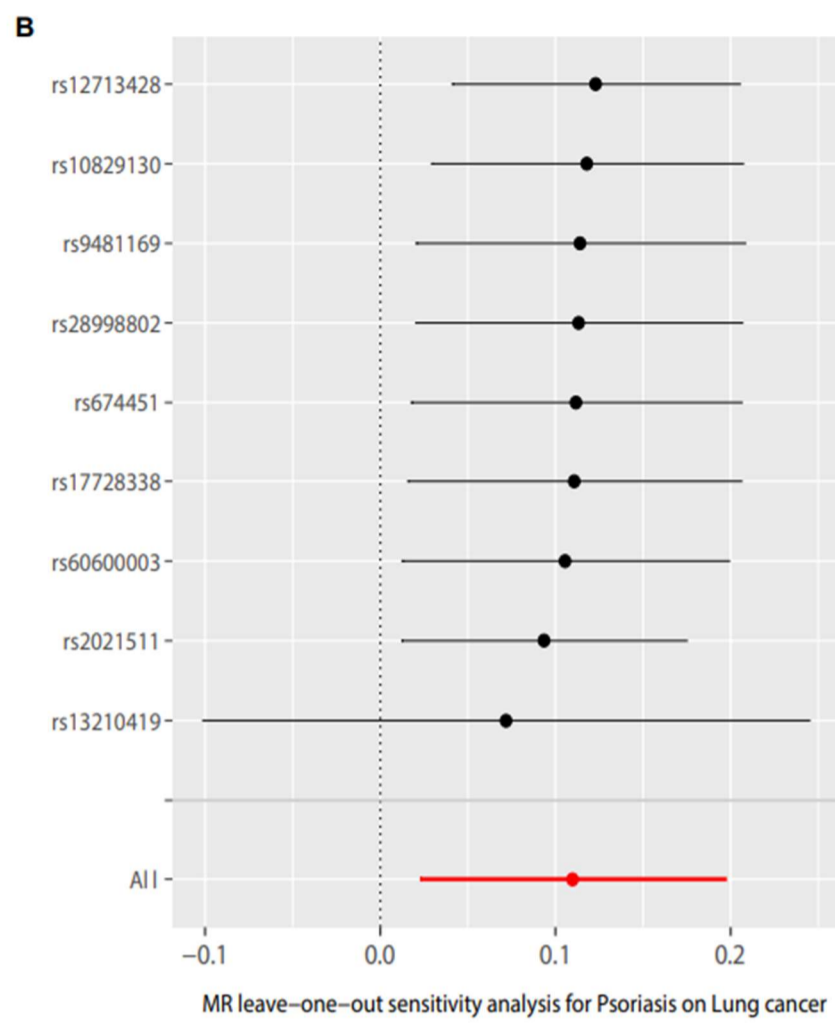

**Supplementary Figure 1. Mendelian randomization leave-one-out sensitivity analysis for psoriasis on site-specific cancers.** Mendelian randomization leave-one-out sensitivity analysis for psoriasis on (A) Breast cancer and (B) Lung cancer. Error bars represent 95% confidence intervals. Abbreviation: MR, Mendelian randomization

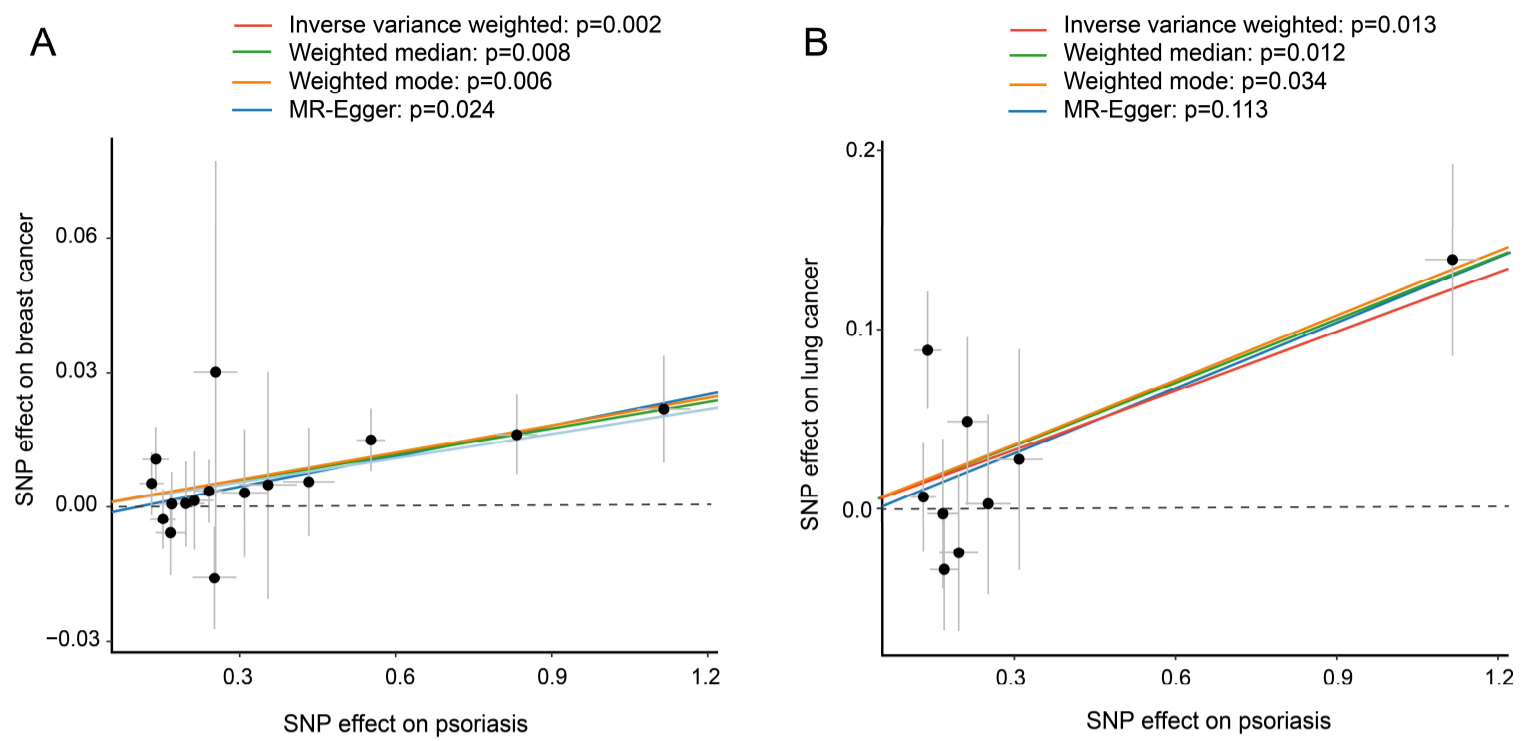

**Supplementary Figure 2. Scatter plot of individual SNP-psoriasis and SNP-cancer associations with overlay of causal estimate from MR test.** The vertical axis depicts the effect of SNPs on various malignancies, whereas the horizontal axis represents the effect of SNPs on psoriasis. Each dot represents one SNP. A non-zero gradient in the lines, with the displayed p value in the top box for the various Mendelian randomization models employed (represented by different colors), serves as evidence regarding the causality between psoriasis and cancers. Error bars represent 95% confidence intervals. Data are presented for breast cancer (A) and lung cancer (B).

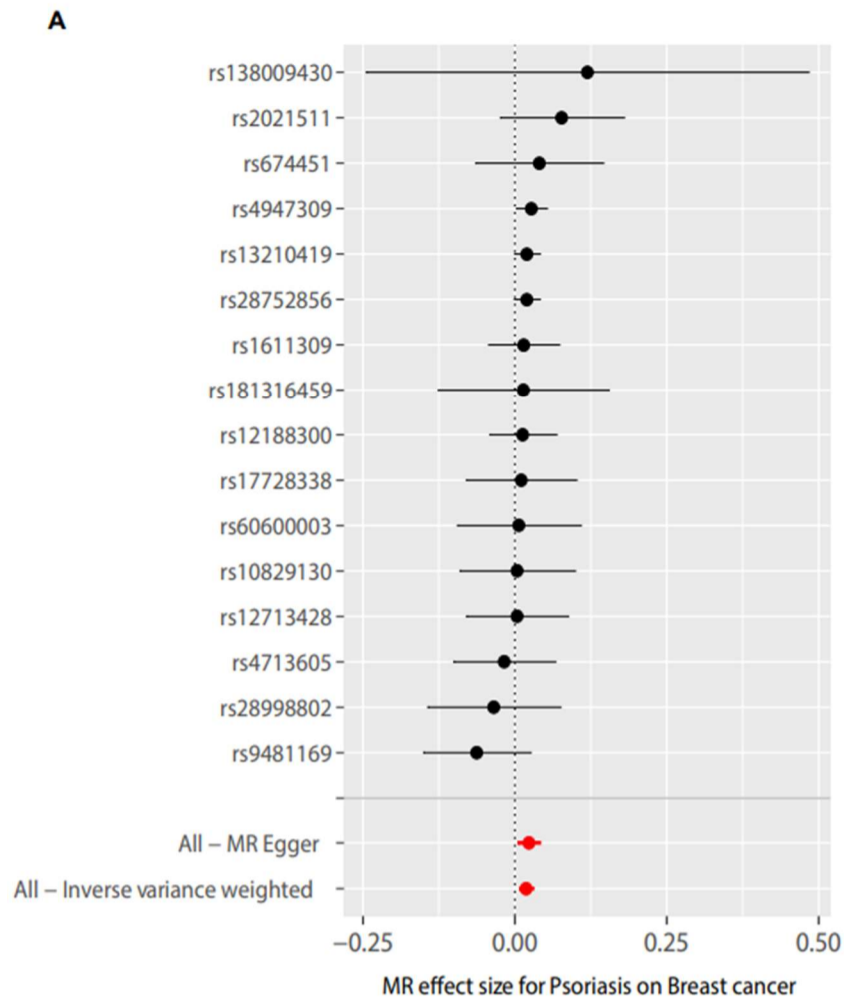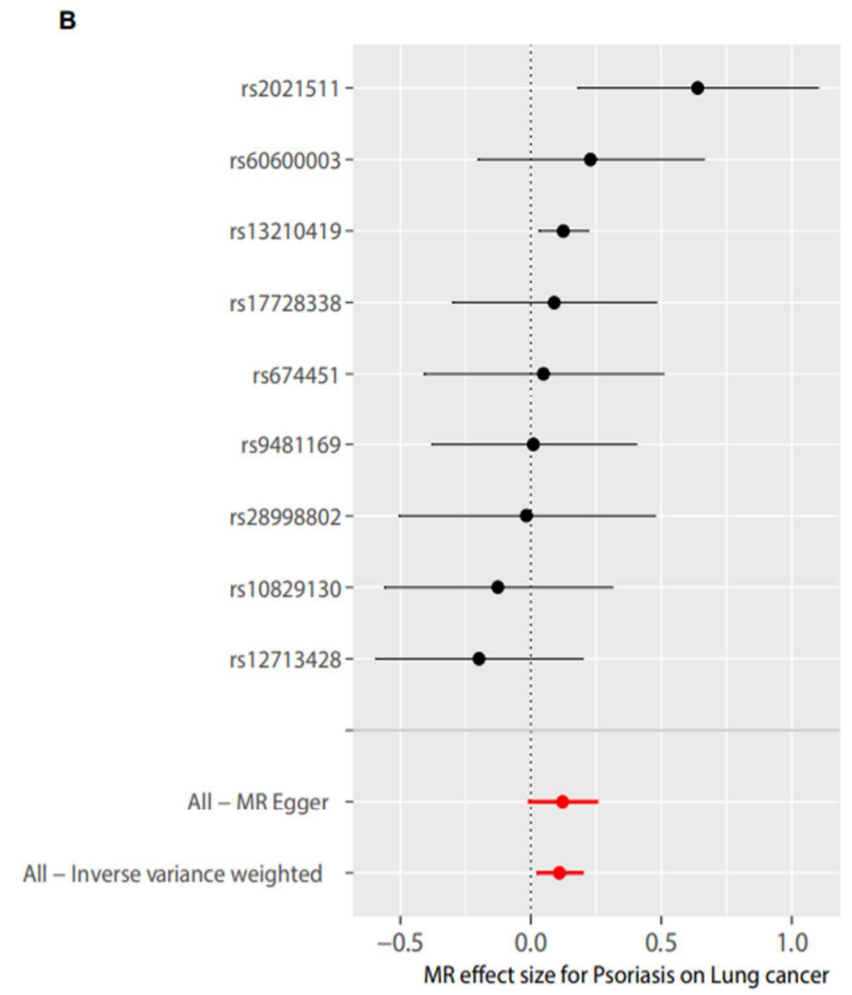

**Supplementary Figure 3. Forest plot to visualize causal effect of psoriasis on the risk of site-specific cancer.** Forest plot to visualize causal effect of psoriasis on (A) Breast cancer and (B) Lung cancer. Error bars represent 95% confidence intervals. Abbreviation: MR, Mendelian randomization.

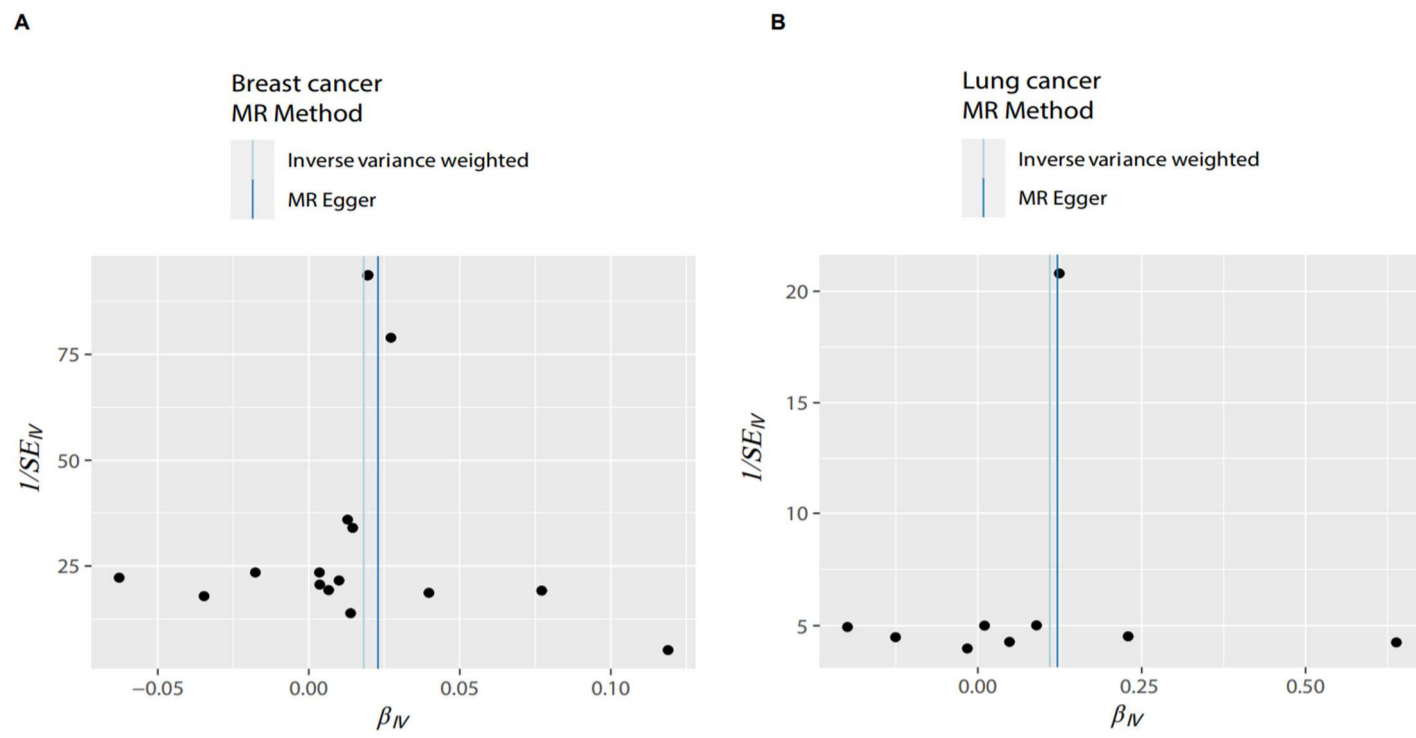

**Supplementary Figure 4. Funnel plots to visualize causal effect of psoriasis on the risk of site-specific cancers.** Funnel plots to visualize causal effect of psoriasis on (A) Breast cancer and (B) Lung cancer. Each dot represents one SNP with the MR estimate (Beta coefficient) on the horizontal axis and the precision of the estimate (inverse of the standard error) on the vertical axis. The vertical line indicates the overall MR estimate by different methods. Abbreviation: MR, Mendelian randomization.

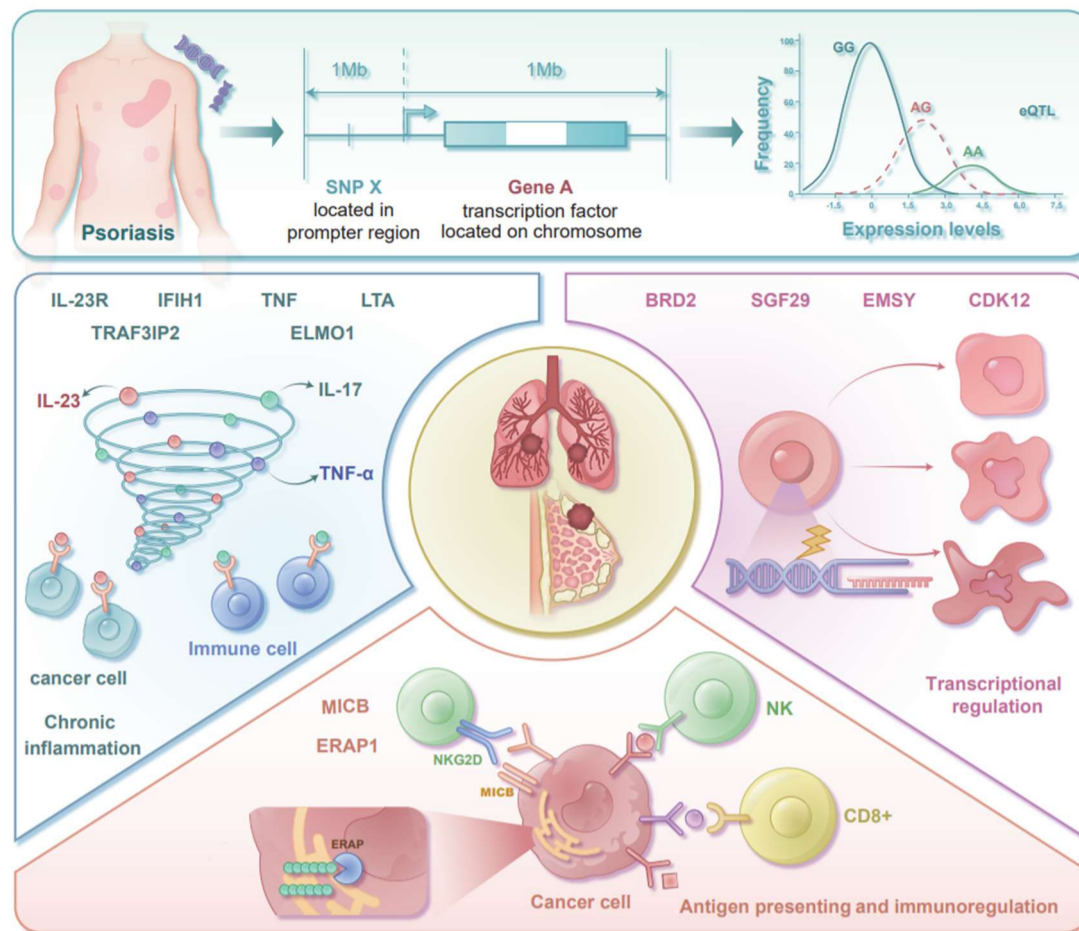

**Supplementary Figure 5. Possible mechanisms of cancer development in psoriasis patients**

Psoriasis susceptibility loci harbored genes may promote lung and breast cancers through three potential mechanisms. (1) Altered expression of genes related to transcriptional regulation and cell cycle regulation (e.g., BRD2, SGF29, EMSY, and CDK12) may lead to uncontrolled cell transformation into tumor cells. (2) Chronic inflammation caused by upregulated cytokines, activated NF- $\kappa$ B pathway, and the IL-23/Th17 axis related to genes such as IL-23R, IFIH1, TNF, LTA, TRAF3IP2, and ELMO1 may contribute to tumor development and progression. (3) Genes related to MHC I molecules (e.g., MICB and ERAP1) play a role in antigen processing and presentation. Changes in ERAP1 may lead to altered peptide antigen modification in the endoplasmic reticulum, while MICB, as a ligand for NKG2D, promotes NK cell cytotoxicity upon binding to the NKG2D receptor on the surface of NK cells. Alterations in these genes may result in changes in antigen presentation and immune regulation disorders, potentially promoting tumor immune escape.
