# Supplementary material for: An observational and genetic investigation into the association between psoriasis and risk of malignancy
Source: PubMed Central journal article supplement — Nat Commun. 2024 Sep 11;15:7952. doi: 10.1038/s41467-024-51824-6 (PMC11391051; doi:10.1038/s41467-024-51824-6), 2024-09-11
Supplement: 41467_2024_51824_MOESM3_ESM.pdf [file 41467_2024_51824_MOESM3_ESM.pdf]

## **Description of Additional Supplementary Files**

**Supplementary Data 1.** Data sources used in PRS calculation and two-sample Mendelian Randomization analysis.
